# Supplementary material for: A universal gene expression system for fungi
Source: PubMed Central journal article supplement — Nucleic Acids Res. 2018 Jun 19;46(18):e111. doi: 10.1093/nar/gky558 (PMC6182139; doi:10.1093/nar/gky558), 2018-06-19
Supplement: gky558_supplemental_files.pdf [file gky558_supplemental_files.pdf]

# A UNIVERSAL GENE EXPRESSION SYSTEM FOR FUNGI

Anssi Rantasalo, Christopher P. Landowski, Joosu Kuivanen, Annakarin Korppoo, Lauri Reuter, Outi Koivistoinen, Mari Valkonen, Merja Penttilä, Jussi Jäntti\*, and Dominik Mojzita\*

VTT Technical Research Centre of Finland, Espoo, P.O. Box 1000, FI-02044 VTT, Finland

\* To whom correspondence should be addressed. Tel: +358 50 5227846; Fax: +358 20 7227071; Email: [jussi.jantti@vtt.fi](mailto:jussi.jantti@vtt.fi) or Tel: +358 40 3591913; Fax: +358 20 7227071; Email: [dominik.mojzita@vtt.fi](mailto:dominik.mojzita@vtt.fi)

## Supplementary figures:

**Supplementary Figure 1:** Alternative SES system (SES-B) and the quantification of its performance in fungal hosts.

**Supplementary Figure 2:** Constitutive expression enabled by the SES in filamentous fungi; comparison with the widely used CBH1 promoter based expression system in *T. reesei*.

**Supplementary Figure 3:** Analysis of the intrinsic activation of SES-A-NC system in *P. kudriavzevii*.

**Supplementary Figure 4:** Numerical values for the flow cytometry analysis and fluorometry analysis of the strains harboring the SES.

**Supplementary Figure 5:** Comparison of the SES and established expression tools (native promoters) in selected fungi.

**Supplementary Figure 6:** Transcription of *cbh1*, sTF, *tef1a* and actin-encoding genes in strains cultivated in bioreactors.

**Supplementary Figure 7:** Universal SES system for novel hosts.

**Supplementary Figure 8:** Test of genetic stability of the SES system.

## Supplementary tables:

**Supplementary Table 1:** Parental strains used in this study.

**Supplementary Table 2:** Candidate core promoter sequences.

**Supplementary Table 3:** DNA sequences of mCherry, *CBH1* and sTFs.

**Supplementary Table 4:** Sequences of sTF binding sites.

**Supplementary Table 5:** Selection markers, integration loci, and length of the integration flanks.

**Supplementary Table 6:** CRISPR targeting sequences used for crRNA design.

**Supplementary Table 7:** Primers used for RT-PCR-based analysis of genomic integrations.

**Supplementary Table 8:** The detector's voltages used in flow cytometry analysis.

**Supplementary Table 9:** Primers and gene targets used in transcription analysis.

**Supplementary Table 10:** *Z. lentus* *ACT1* – partial CDS.

**Supplementary Table 11:** *Z. lentus* *YIP3* – genomic fragment.

**Supplementary Table 12:** DNA sequences of the established fungal promoters used for comparisons with the SES-A system.

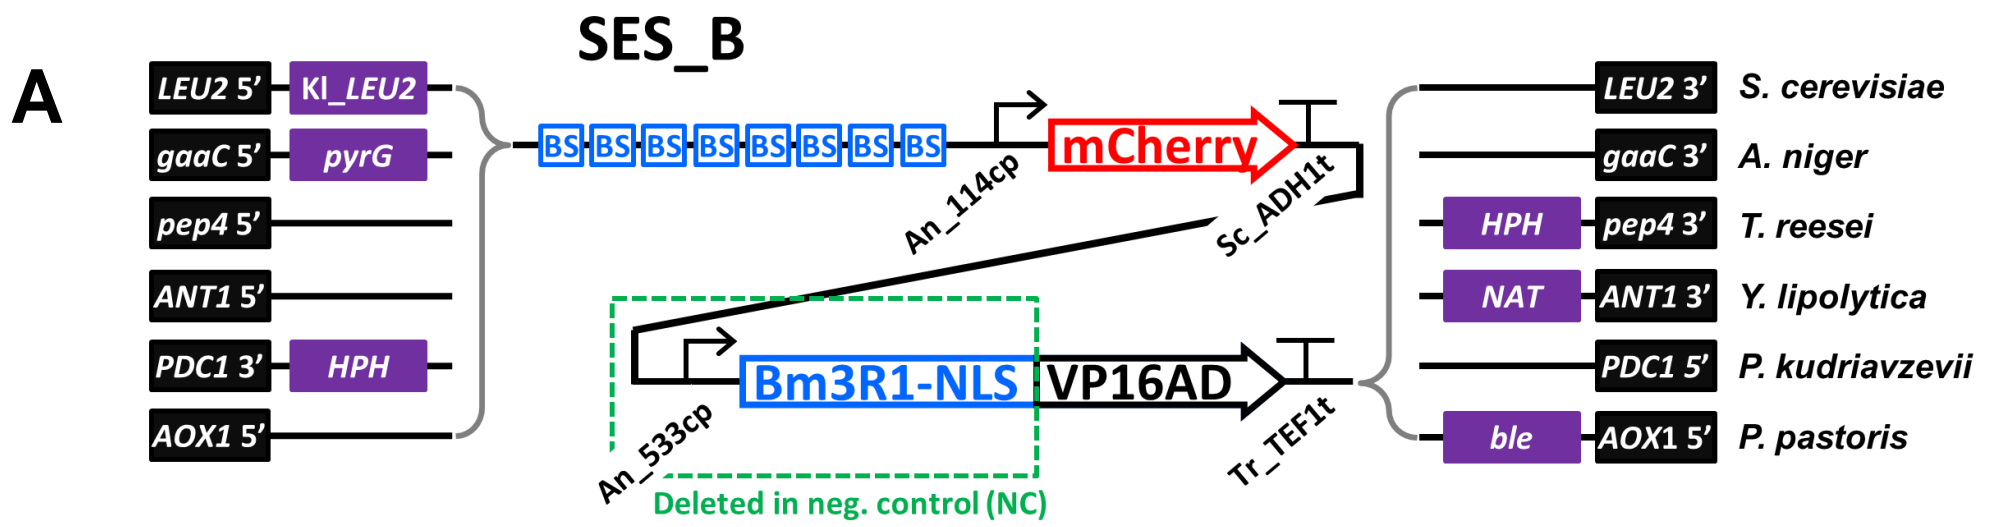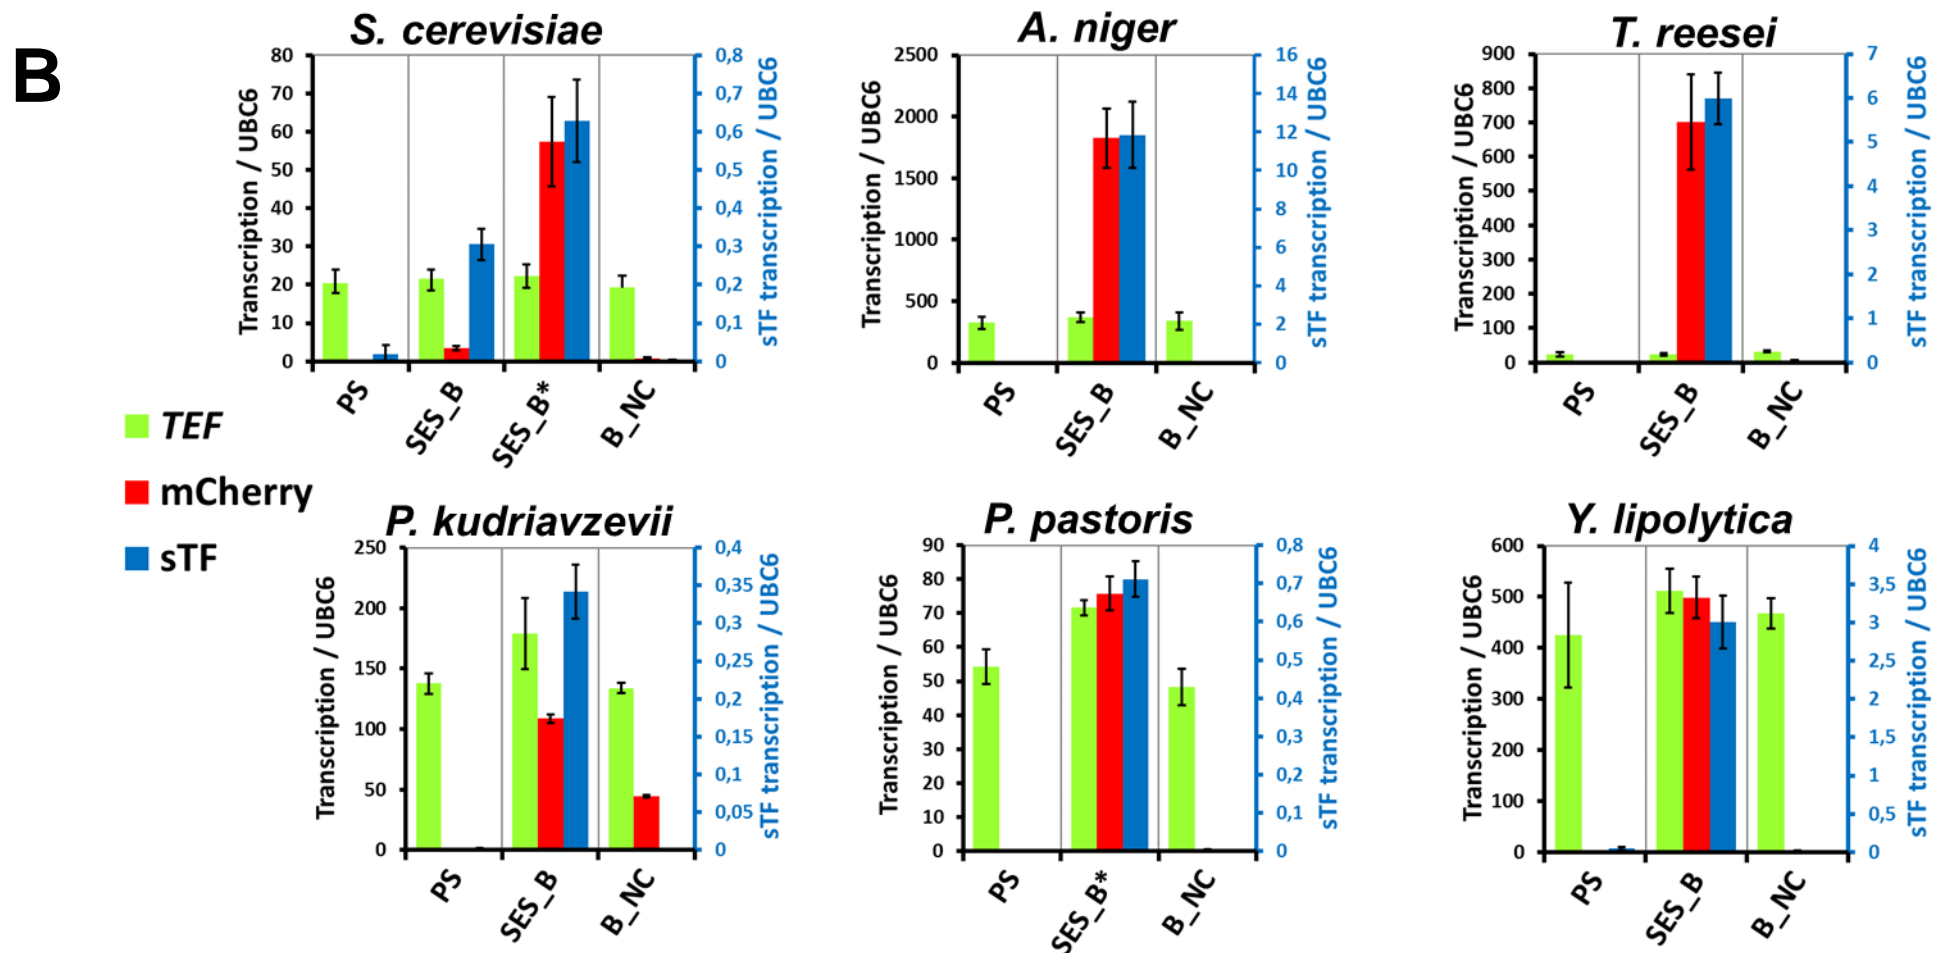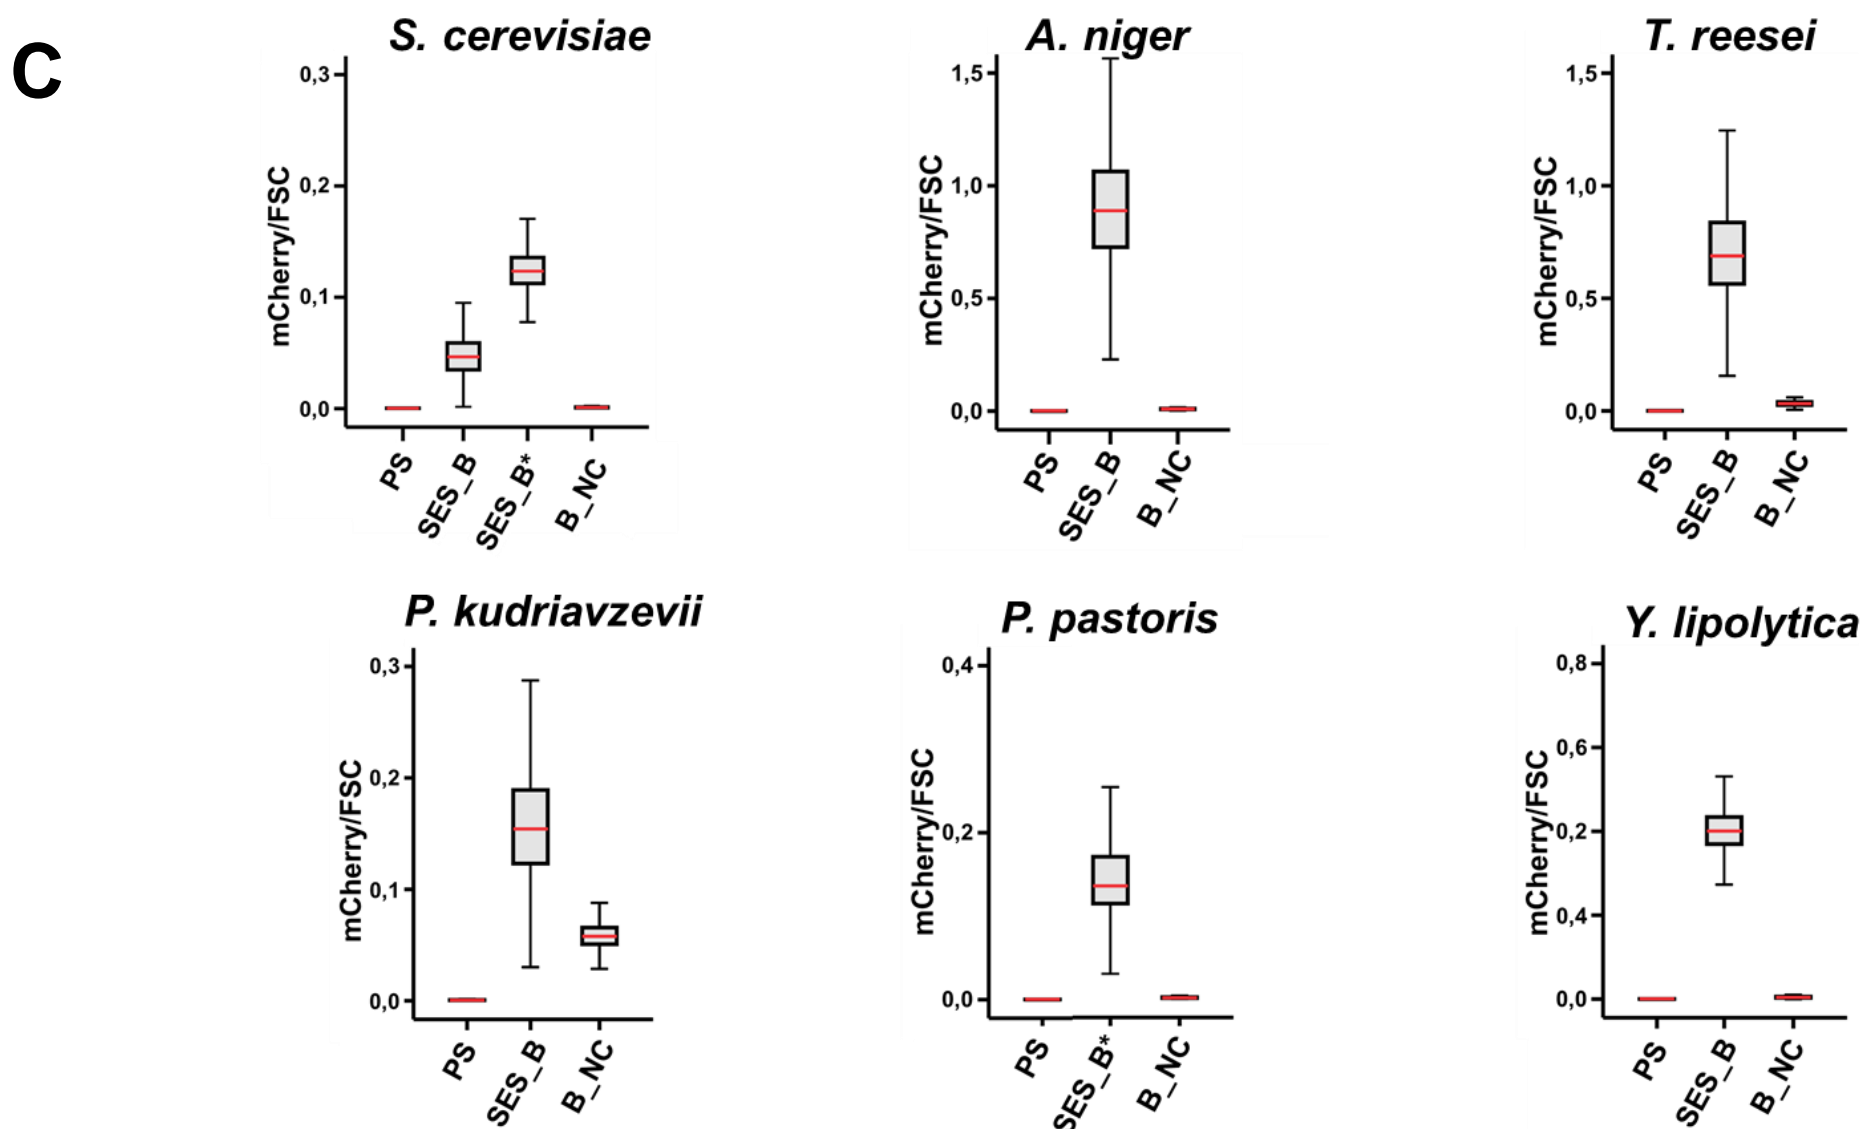

**Supplementary Figure 1**

Alternative SES system (SES-B) and the quantification of its performance in fungal hosts.

**Supplementary Figure 1. Alternative SES system (SES-B) and quantification of its performance in fungal hosts.**

- A) Schematic presentation of an alternative version of the SES system (SES-B), including positions of selection markers and genome-integration flanks for the listed species. The An\_53301 core promoter (An\_533cp) was used for the expression of the sTF (Bm3R1-NLS-VP16). The mCherry expression was controlled by the sTF via the sTF-specific binding sites (BS) positioned upstream of the An\_1147651 core promoter (An\_114cp). The negative control (NC) lacks the region spanning the core promoter (An\_533cp) and a large portion of the sTF. Each cassette was integrated in the specified genomic locus in single copy.
- B) Transcription analysis of the strains. The mCherry transcript levels were compared to the transcript levels of endogenous *TEF* genes in each host. Transcript levels of the sTF are shown on the secondary y-axis. PS denotes the parental strains (without SES). In *S. cerevisiae*, in addition to the SES-B, also a modified version was tested having the *S. cerevisiae*-codon-optimized sTF gene, which is indicated by an asterisk (SES-B\*). In *P. pastoris*, only the SES-B\* version was used. The transcription of the *UBC6* gene homologs (**Supplementary Table 9**) in each species were used for normalization. Values and error bars represent the mean and standard deviation from two biological (four technical) replicates.
- C) Analysis of mCherry expression by flow-cytometry. Flow-cytometry was performed on cells (yeast species) or conidia (filamentous fungi). The box plots show the fluorescence intensity (mCherry) normalized by the particle (cell/conidia) size (FSC – forward scatter) for ~10,000 cells/conidia from each strain. The horizontal red line (inside the grey box) represents the median value, the grey box represents the interquartile range (IQ range), the bottom line of grey box represents the 25% percentile value, the top line of grey box represents the 75% percentile value. The whiskers in box plot together with the IQ range, represent about 99% of all measured instances (cells/conidia) (for numerical values see **Supplementary Fig. 4A**). Alternative fluorescence analysis of the strains was performed by quantitative fluorometry (**Supplementary Fig. 4B and 4C**).



*Aspergillus niger* (SES\_A) sporulation

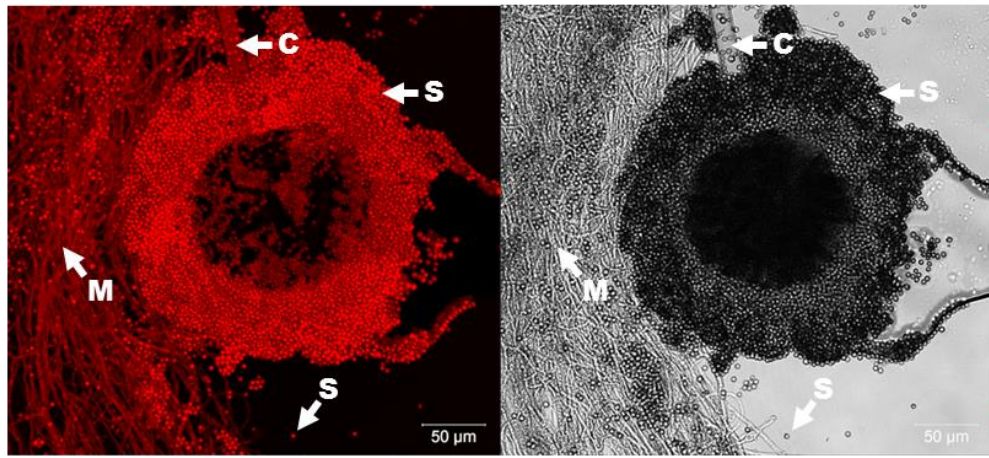

*Trichoderma reesei* (SES\_A) sporulation

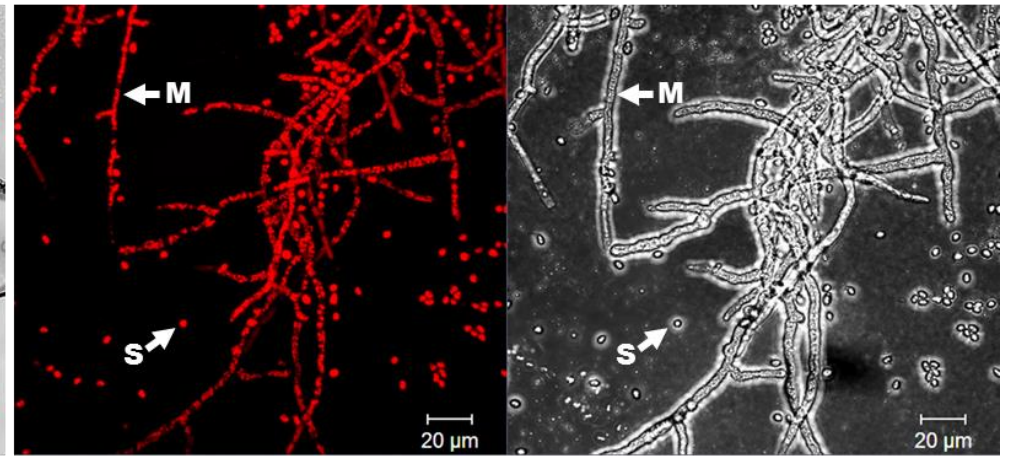

*Trichoderma reesei* (CBH1 promoter-mCherry) sporulation on cellulose

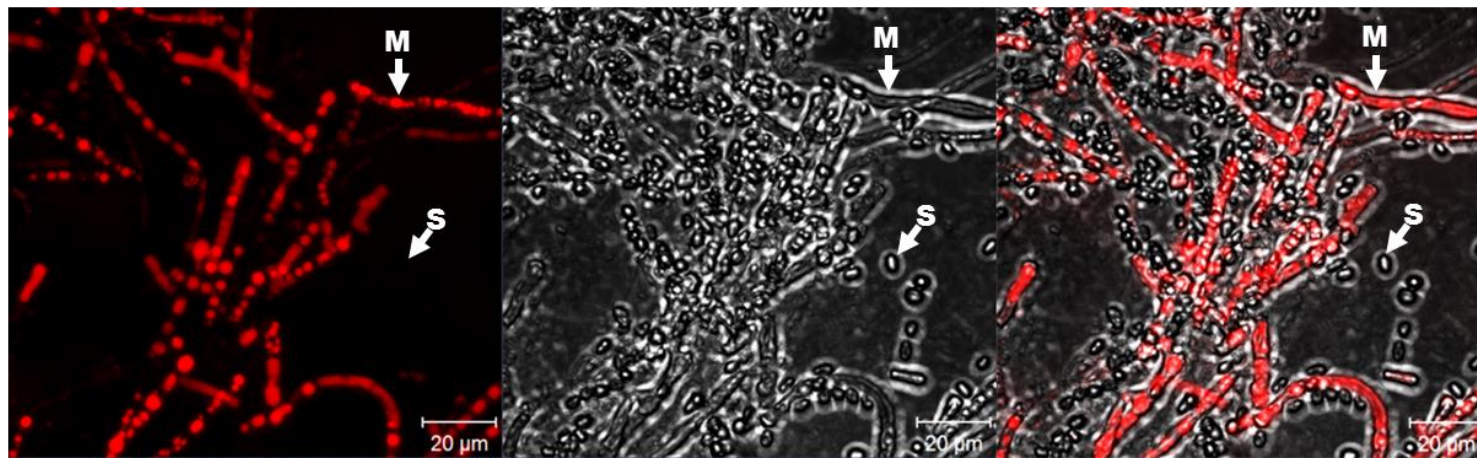

## Supplementary Figure 2

Constitutive expression enabled by the SES in filamentous fungi; comparison with the widely used CBH1 promoter based expression system in *T. reesei*.

SES system confers highly constitutive expression as demonstrated by uniformly distributed mCherry fluorescence in different developmental stages in filamentous fungi: mycelia (arrow with M), conidiophore (arrow with C), and conidia/spores (arrow with S). In contrast, when the mCherry gene was placed under the control of a strong, inducible *cbh1* promoter in *T. reesei*, only mycelia were highly fluorescent and negligible expression was observed in conidia in the cellulase-inducing conditions in presence of cellulose (lower panel).

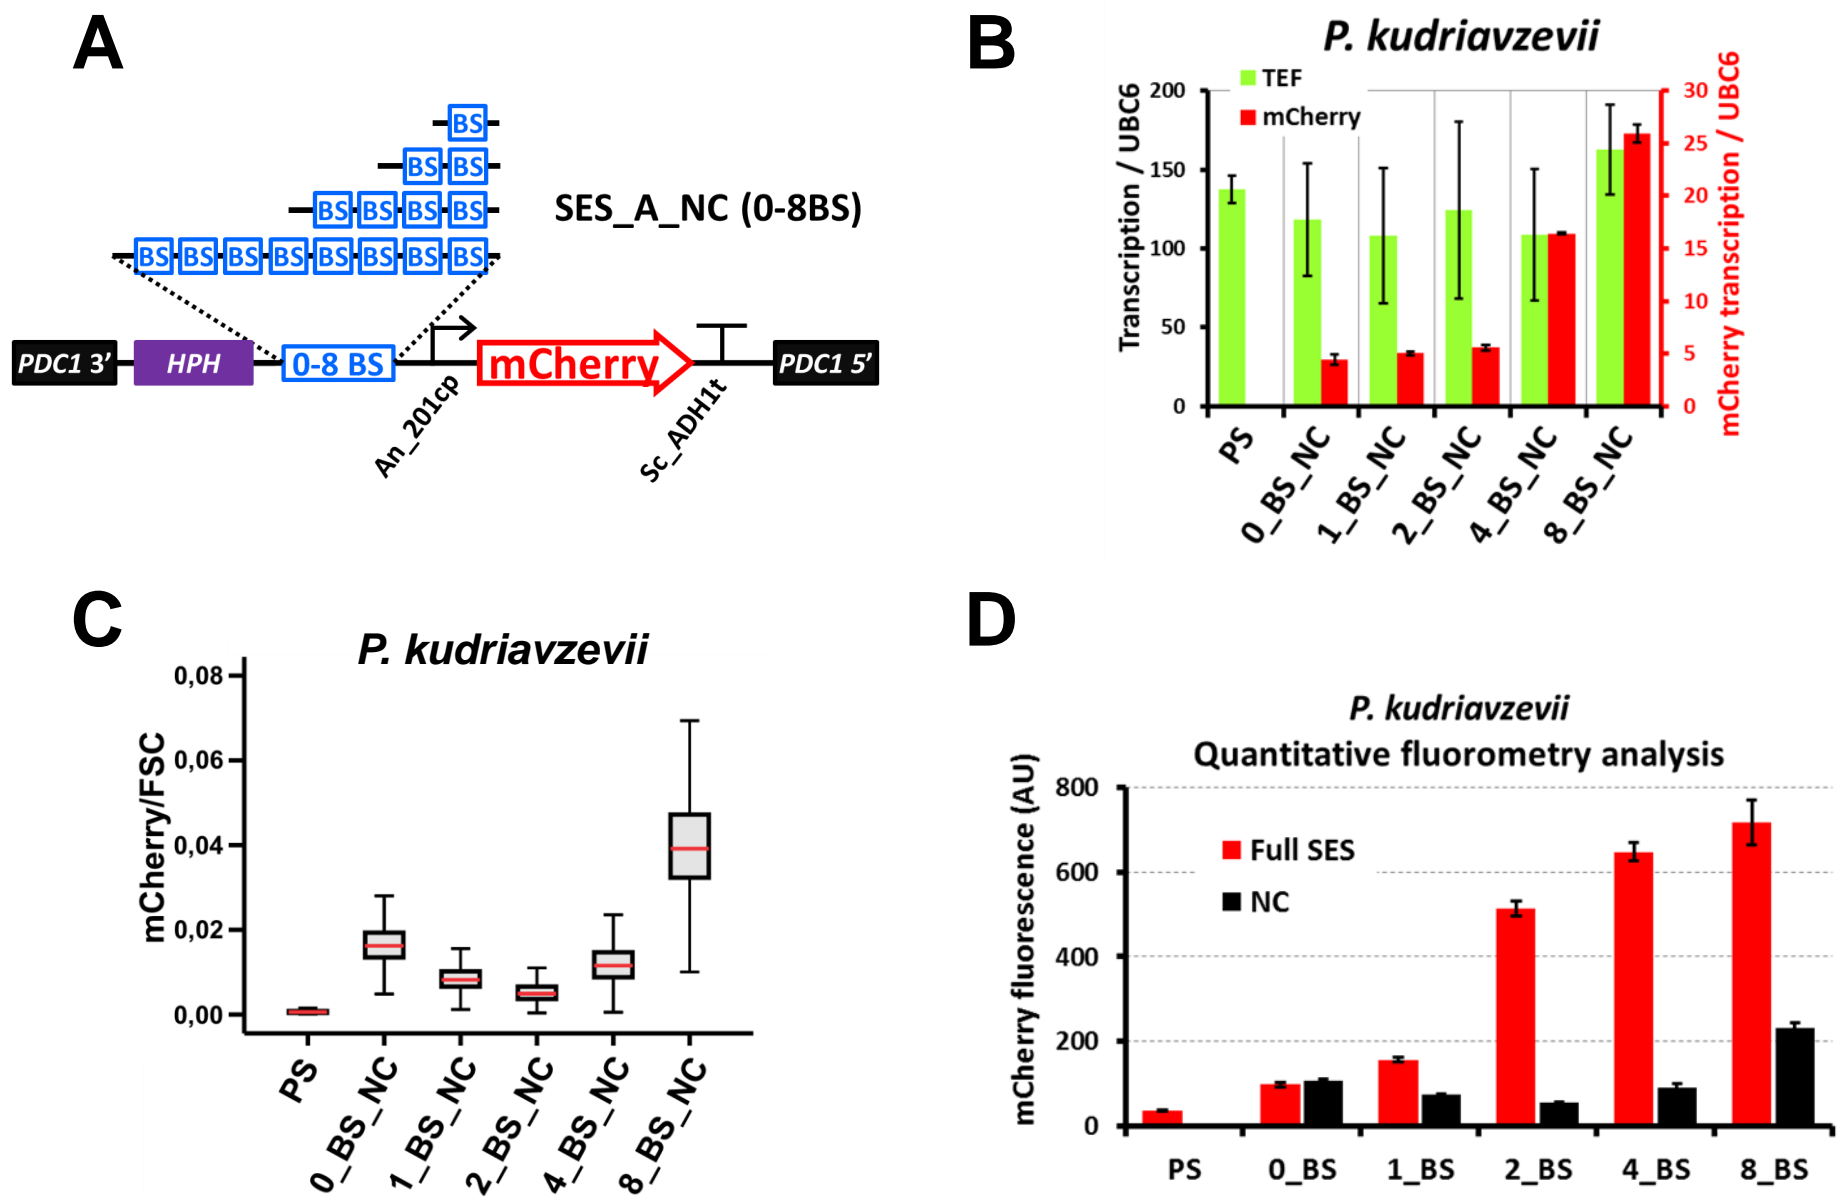

### Supplementary Figure 3

Analysis of the intrinsic activation of SES-A-NC system in *P. kudriavzevii*.

- A) Schematic presentation of the DNA cassette, containing the SES-A-NC versions with zero to eight sTF-binding sites, used for genome integration in *P. kudriavzevii*. The positions of selection marker (HPH) as well as the integration DNA-flanks (*PDC1* locus) are shown.
- B) Transcription analysis of the strains. The mCherry transcript levels were compared to transcript levels of the endogenous *TEF1* gene. PS denotes parental strain (without SES). The values and error bars represent the mean and standard deviation from two biological (four technical) replicates.
- C) Analysis of the mCherry fluorescence by flow-cytometry measurements of *P. kudriavzevii* strains. The box plots show the same features as in **Fig. 3B**.
- D) Quantitative fluorometry analysis of the strains. The graphs show the fluorescence intensity (mCherry) normalized by the optical density of the cell suspensions used for the fluorometry analysis. The strains of *P. kudriavzevii* harboring the SES-A\_0-8BS versions are also included and these strains correspond to those shown in **Fig. 4B** and **4C**. The values and error bars represent the mean and standard deviation from three biological replicates. The cultivation conditions in (B-D) were identical to those used in the transcription analysis of *P. kudriavzevii* (**Fig. 3A**). The impact of the diverse number of the sTF binding sites on the mCherry production (in absence of the sTF) indicates an intrinsic activation of the expression by an unidentified native TF in *P. kudriavzevii*.

**A** Numerical values ( $\times 10^{-3}$ ) for the flow cytometry analysis (Fig. 3b)

|                        | PS                    | SES-A                     | SES-A-NC                  | SES-B                     | SES-B-NC                |
|------------------------|-----------------------|---------------------------|---------------------------|---------------------------|-------------------------|
| <i>S. cerevisiae</i>   | 0.3 ± 0.3<br>(n=9998) | 28.8 ± 16.7<br>(n=9995)   | 2.7 ± 1.3<br>(n=9992)     | 48.2 ± 20.5<br>(n=9992)   | 1.1 ± 1.1<br>(n=9993)   |
|                        |                       | 166.9 ± 35.6*<br>(n=9997) |                           | 126.8 ± 32.8*<br>(n=9991) |                         |
| <i>Y. lipolytica</i>   | 0.4 ± 0.4<br>(n=9987) | 476.9 ± 91.8<br>(n=9995)  | 4.1 ± 5.6<br>(n=9990)     | 407.3 ± 74.4<br>(n=9994)  | 5.3 ± 4.5<br>(n=9996)   |
| <i>P. kudriavzevii</i> | 0.7 ± 0.6<br>(n=9962) | 201.5 ± 47.0<br>(n=9982)  | 16.9 ± 5.4<br>(n=9970)    | 159.0 ± 57.0<br>(n=9979)  | 59.2 ± 15.3<br>(n=9979) |
| <i>P. pastoris</i>     | 0.3 ± 0.2<br>(n=9832) | 235.7 ± 97.5*<br>(n=9836) | 0.6 ± 1.0<br>(n=9834)     | 155.3 ± 89.9*<br>(n=9837) | 1.7 ± 1.8<br>(n=9863)   |
| <i>T. reesei</i>       | 0.3 ± 2.5<br>(n=9716) | 750.7 ± 372.3<br>(n=9820) | 141.0 ± 145.4<br>(n=9779) | 761.5 ± 444.0<br>(n=9745) | 34.3 ± 14.3<br>(n=9787) |
| <i>A. niger</i>        | 0.6 ± 0.1<br>(n=9485) | 884.3 ± 219.4<br>(n=9812) | 4.2 ± 13.5<br>(n=9397)    | 893.1 ± 252.9<br>(n=9822) | 9.5 ± 3.8<br>(n=9697)   |

**B**

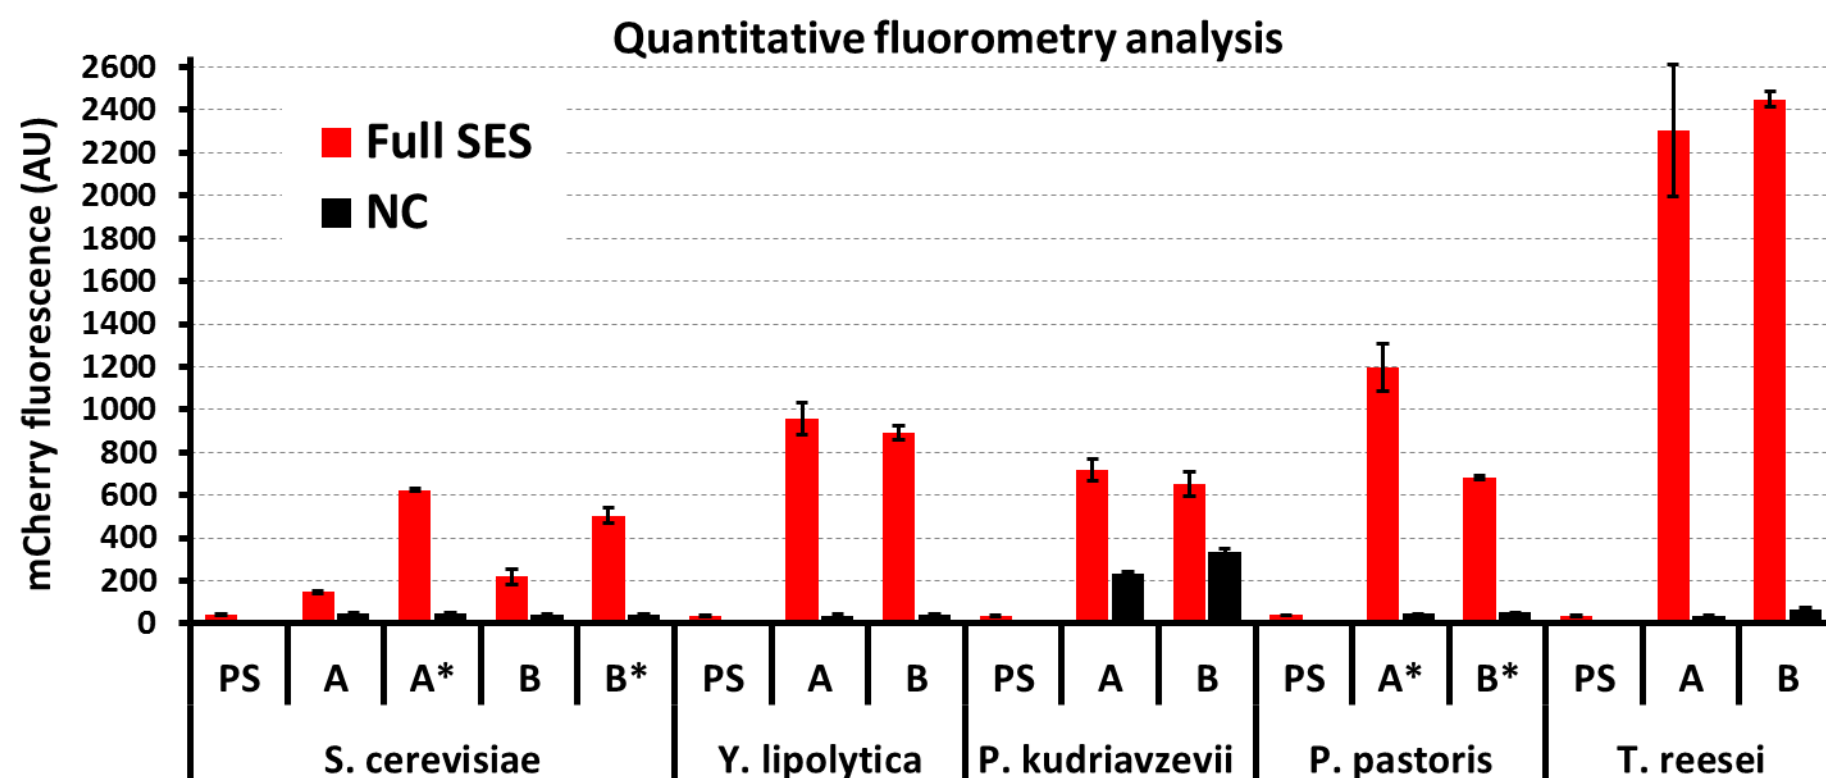

**C**

**Numerical values of the fluorometry analysis**

|                        | PS         | SES-A                       | SES-A-NC     | SES-B                         | SES-B-NC     |
|------------------------|------------|-----------------------------|--------------|-------------------------------|--------------|
| <i>S. cerevisiae</i>   | 41,2 ± 2,3 | 146,8 ± 5,3<br>624,6 ± 8,3* | 49,3 ± 0,8   | 218,6 ± 33,6<br>504,8 ± 36,4* | 42 ± 0,8     |
| <i>Y. lipolytica</i>   | 34,6 ± 1,5 | 959,2 ± 75,5                | 35,5 ± 9,8   | 890,8 ± 32,5                  | 40,6 ± 5,1   |
| <i>P. kudriavzevii</i> | 35,5 ± 0,9 | 716,8 ± 52                  | 230,1 ± 14,2 | 650,8 ± 57,8                  | 336,0 ± 15,5 |
| <i>P. pastoris</i>     | 39,5 ± 2,0 | 1198,0 ± 110,8*             | 45,4 ± 1,3   | 683,0 ± 10,5*                 | 50,5 ± 1,4   |
| <i>T. reesei</i>       | 34,4 ± 3,6 | 2303 ± 308,6                | 34,2 ± 5,8   | 2448,6 ± 35,7                 | 67,3 ± 6,0   |

**Supplementary Figure 4**

Numerical values for the flow cytometry analysis and fluorometry analysis of the strains harboring the SES.

**Supplementary Figure 4. Numerical values for the flow cytometry analysis and the fluorometry analysis of the strains harboring the SES.**

- A) The table shows the mean values with the standard deviations (and number of analysed cells/conidia) of the flow cytometry analysis (shown in **Fig. 3B**).
- B) Quantitative fluorometry analysis of mCherry expression in the SES-containing yeasts and *T. reesei* strains. This analysis was not conducted for *A. niger*, because the morphology and other specific properties of its mycelia prohibit reproducible sample handling in the fluorometry analysis setup. The graphs show fluorescence intensity (mCherry) normalized by the optical density of the cell/mycelia suspensions. Values and error bars represent the mean and standard deviation from at least three independent cultivations.
- C) The table showing the mean values with the standard deviations of the fluorometry measurements shown in (B). The values with asterisk represent use of the SES systems (SES-A\* and SES-B\*) in *S. cerevisiae* and *P. pastoris* with *S. cerevisiae*-codon-optimized version of the sTF.



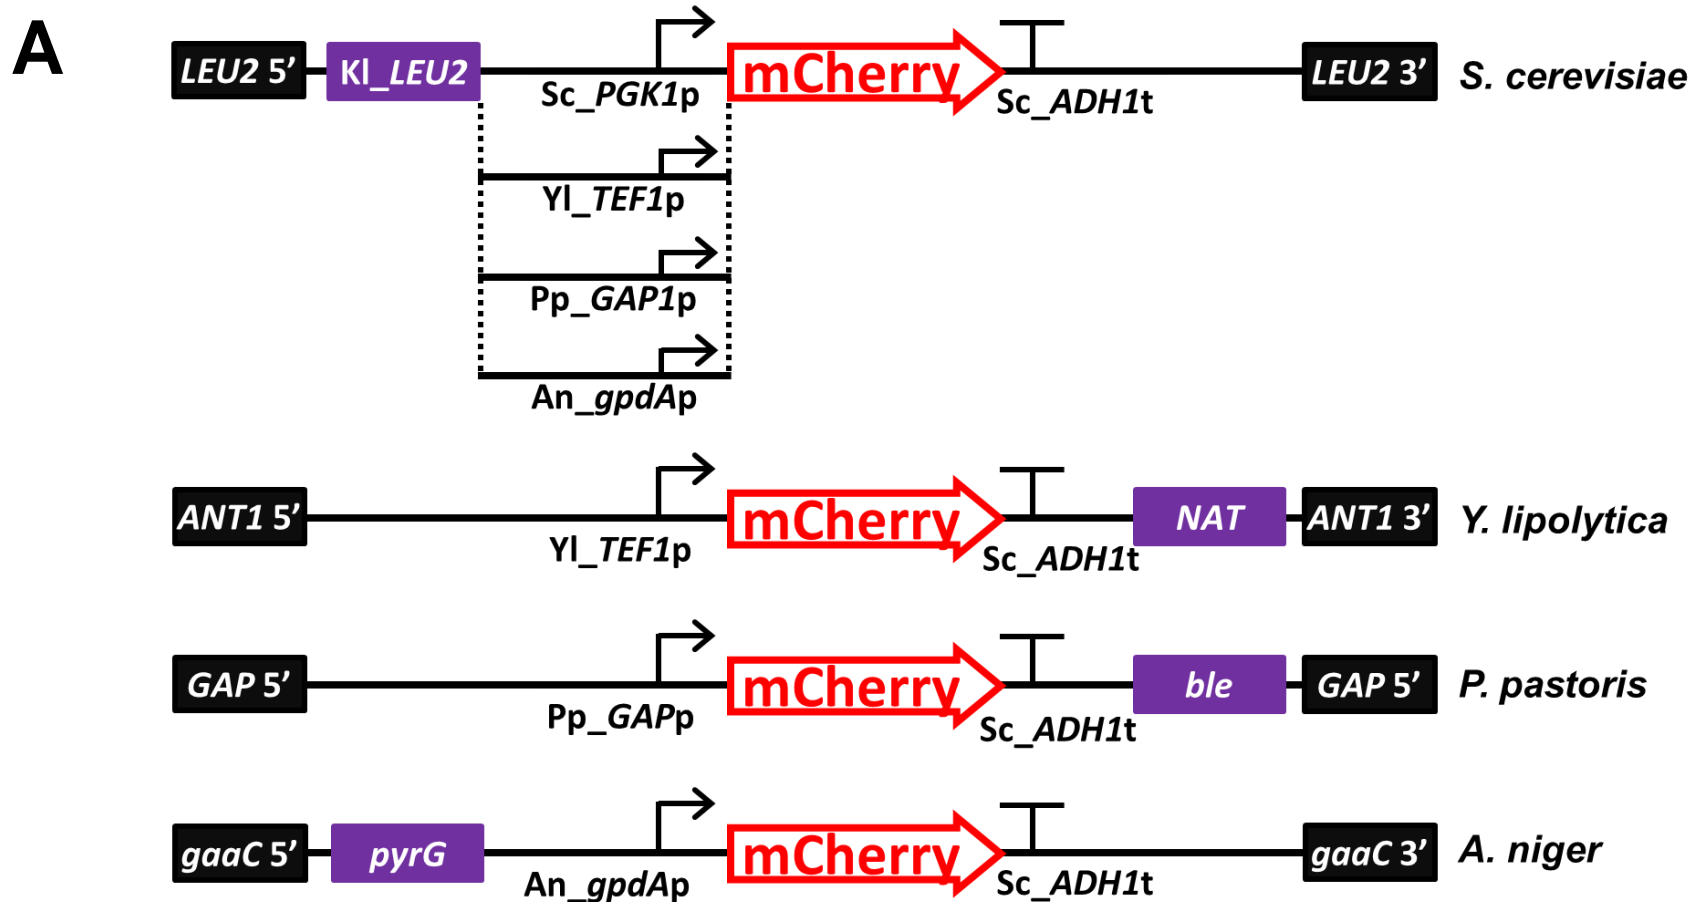

**Fluorometry in yeast strains**

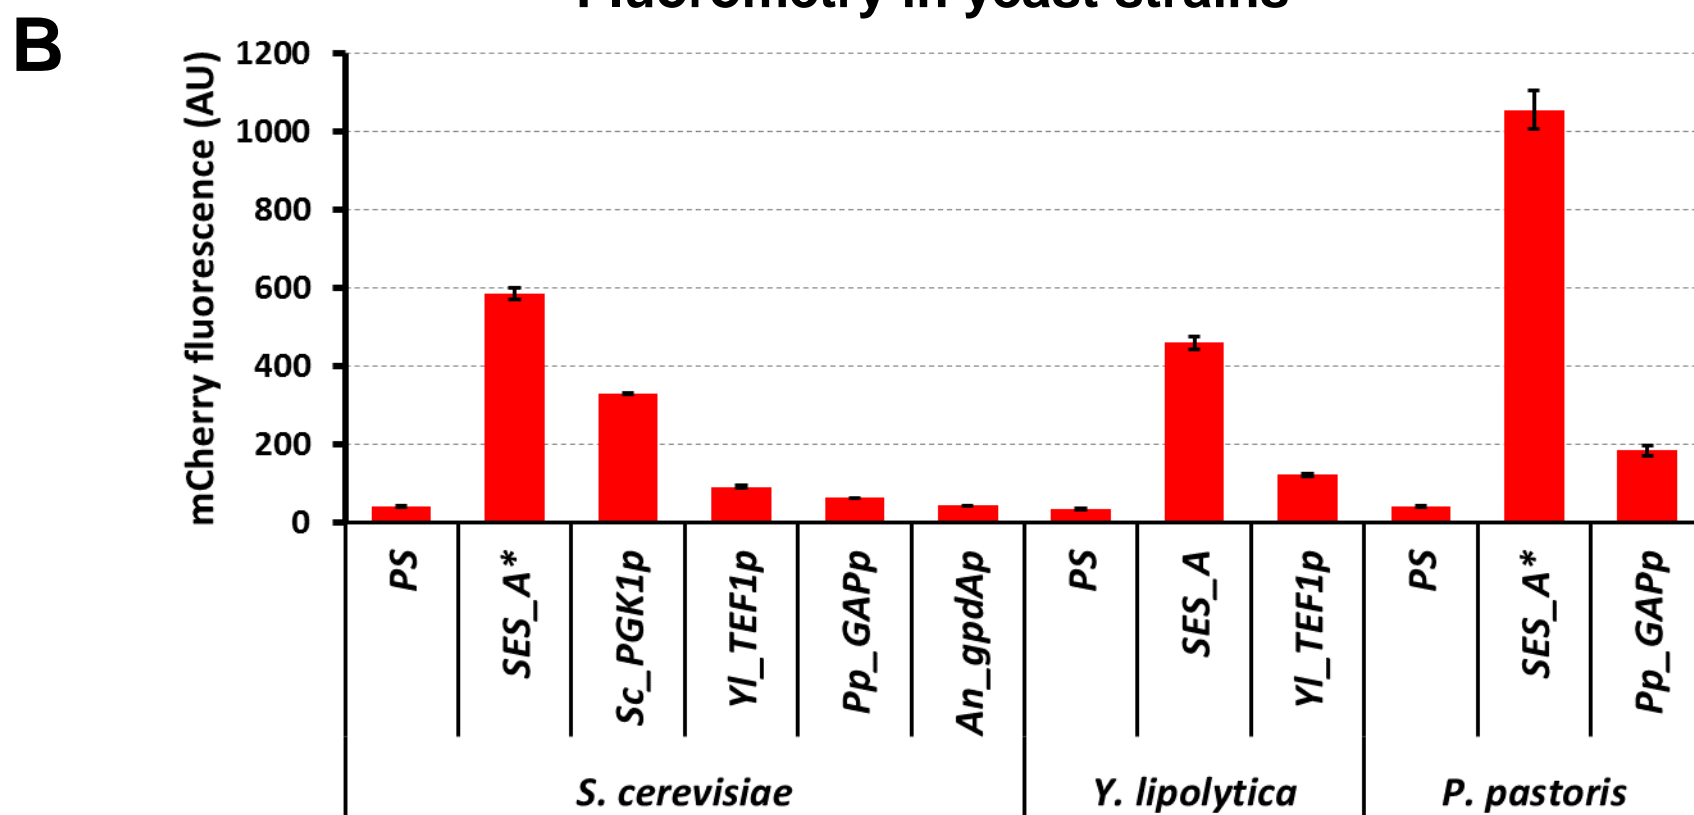

**C** Transcription in *A. niger* strains

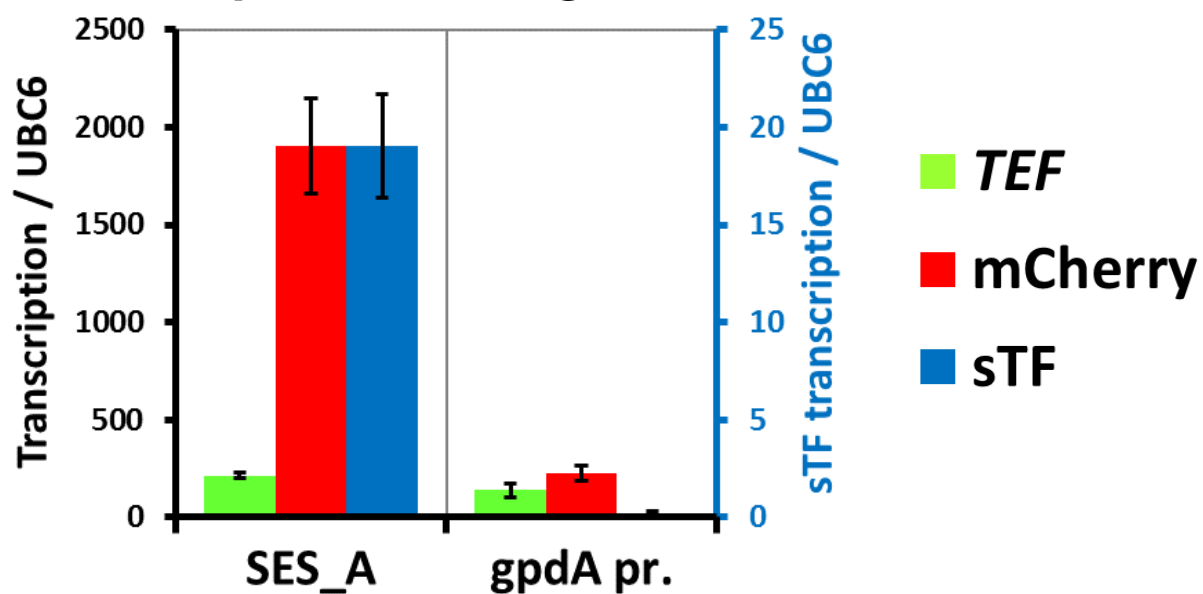

**Supplementary Figure 5**

Comparison of the SES and established expression tools (native promoters) in selected fungi



### Supplementary Figure 5. Comparison of the SES-A system with commonly used gene expression tools

- A) Schematic presentation of the DNA-cassettes, including positions of selection markers and genome-integration flanks, used for testing the established fungal promoters in the listed species. The cassettes tested in *S. cerevisiae* contained: 1) *S. cerevisiae* *PGK1* promoter; 2) *Y. lipolytica* *TEF1* promoter; 3) *P. pastoris* *GAP1* promoter; and 4) *A. nidulans* *gpdA* promoter. The cassette for *Y. lipolytica* contained its native *TEF1* promoter, the cassette for *P. pastoris* (mCherry gene cloned into the pGAPZ\_A vector) contained its native *GAP1* promoter, and the *A. niger* cassette contained the *A. nidulans* *gpdA* promoter which is frequently used in this organism for heterologous gene expression.
- B) Fluorometry analysis of the yeast strains carrying single-copy genome integrated SES-A/SES-A\* cassettes, or the cassettes with the established fungal promoters. PS denotes the parental strains. Values and error bars represent the mean and standard deviation from three independent cultivations.
- C) Transcription analysis of the *A. niger* strains carrying single-copy genome integrated SES-A cassette, or the cassette with the *A. nidulans* *gpdA* promoter. The mCherry, the *tefA* gene, and the sTF (on the secondary y-axis) transcript levels were analyzed and normalized to signal of the *UBC6* homolog gene transcription. Values and error bars represent the mean and standard deviation from two biological (four technical) replicates.

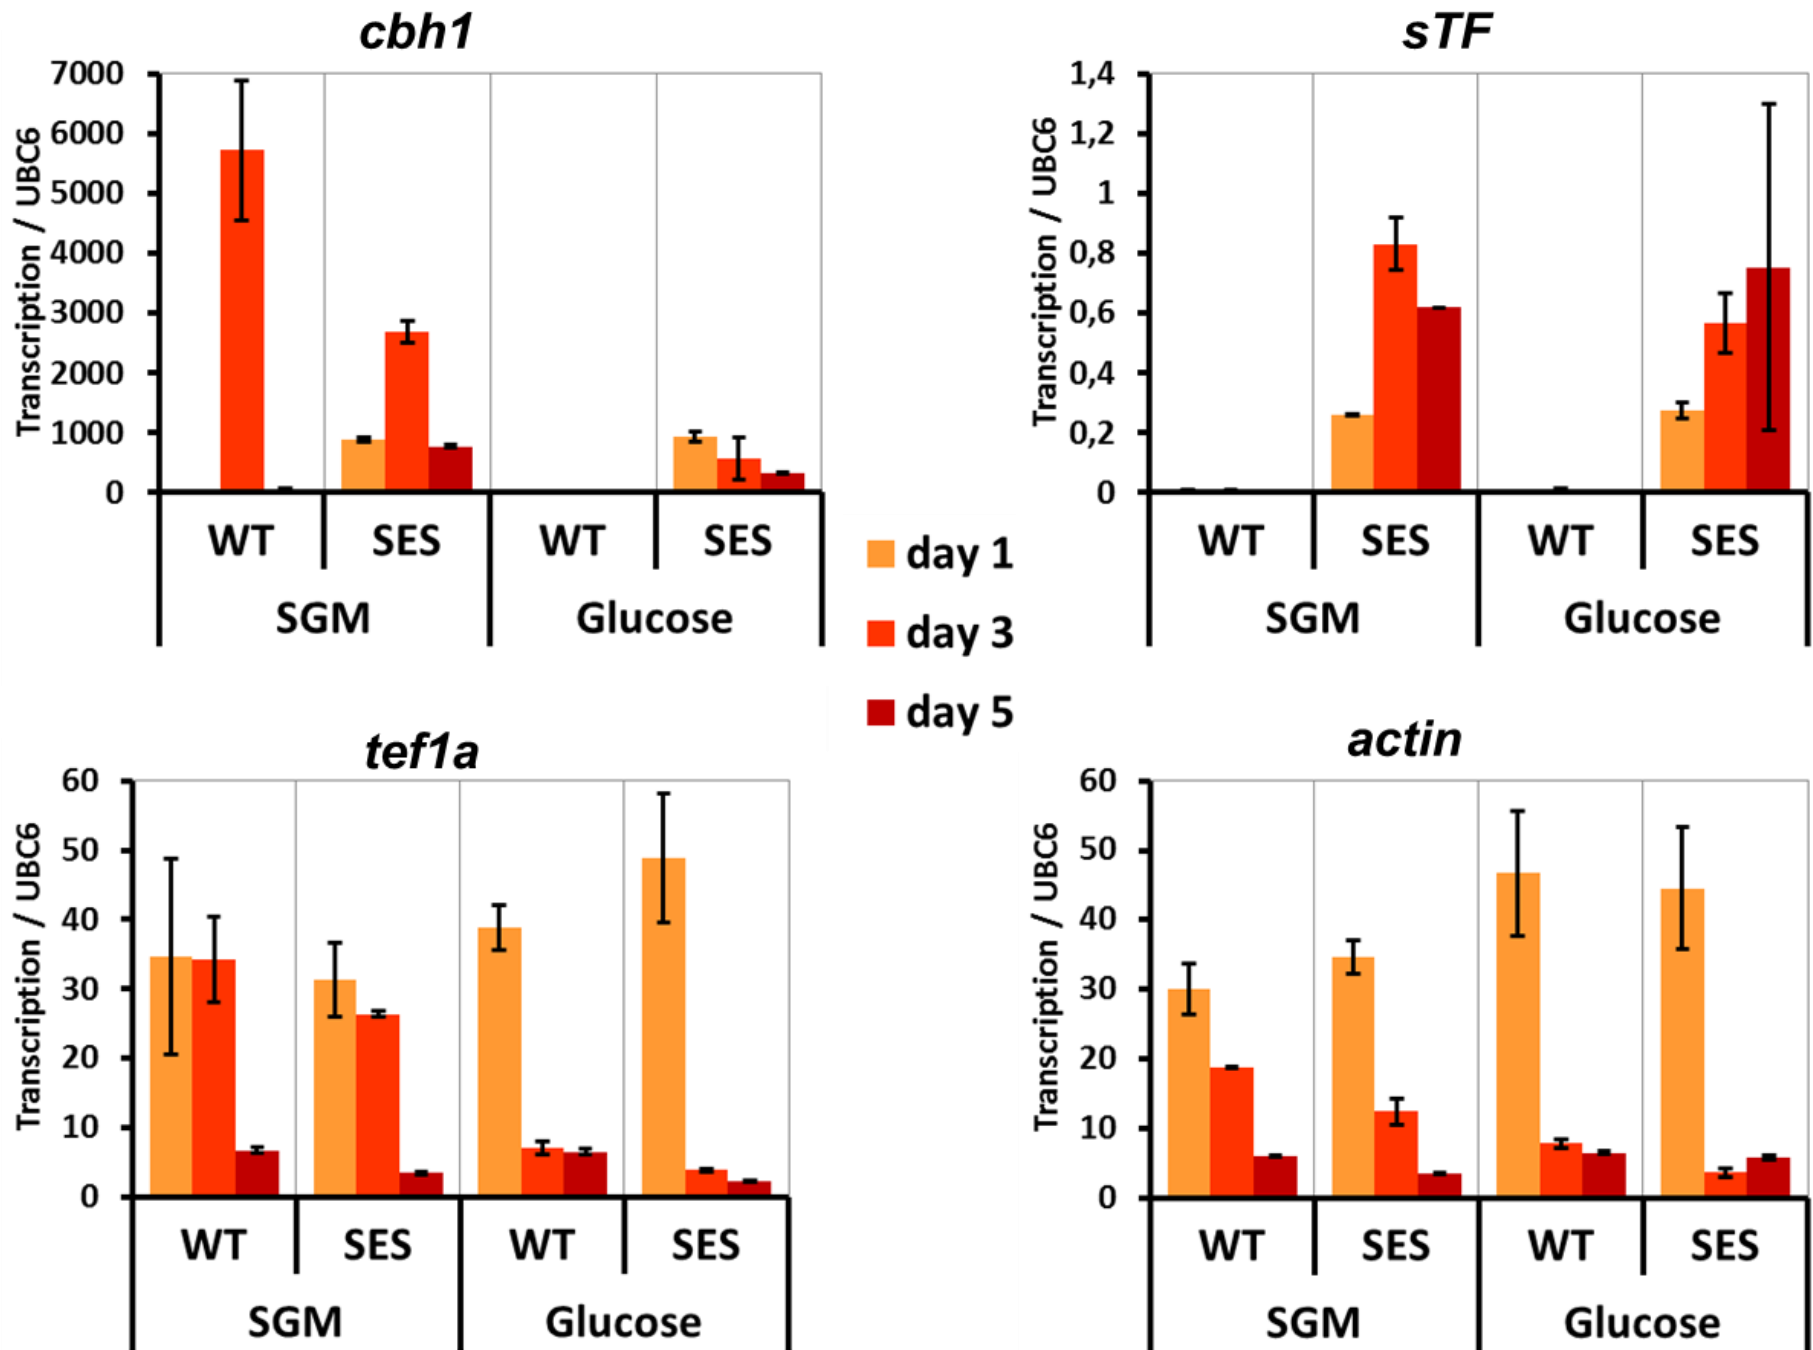

### Supplementary Figure 6

Transcription of *cbh1*, *sTF*, *tef1a* and *actin*-encoding genes in strains cultivated in bioreactors.

Time course transcription profiles are shown for parental (PS) and the SES-C-containing strains. Values and error bars represent the mean and standard deviation from two biological (four technical) replicates.

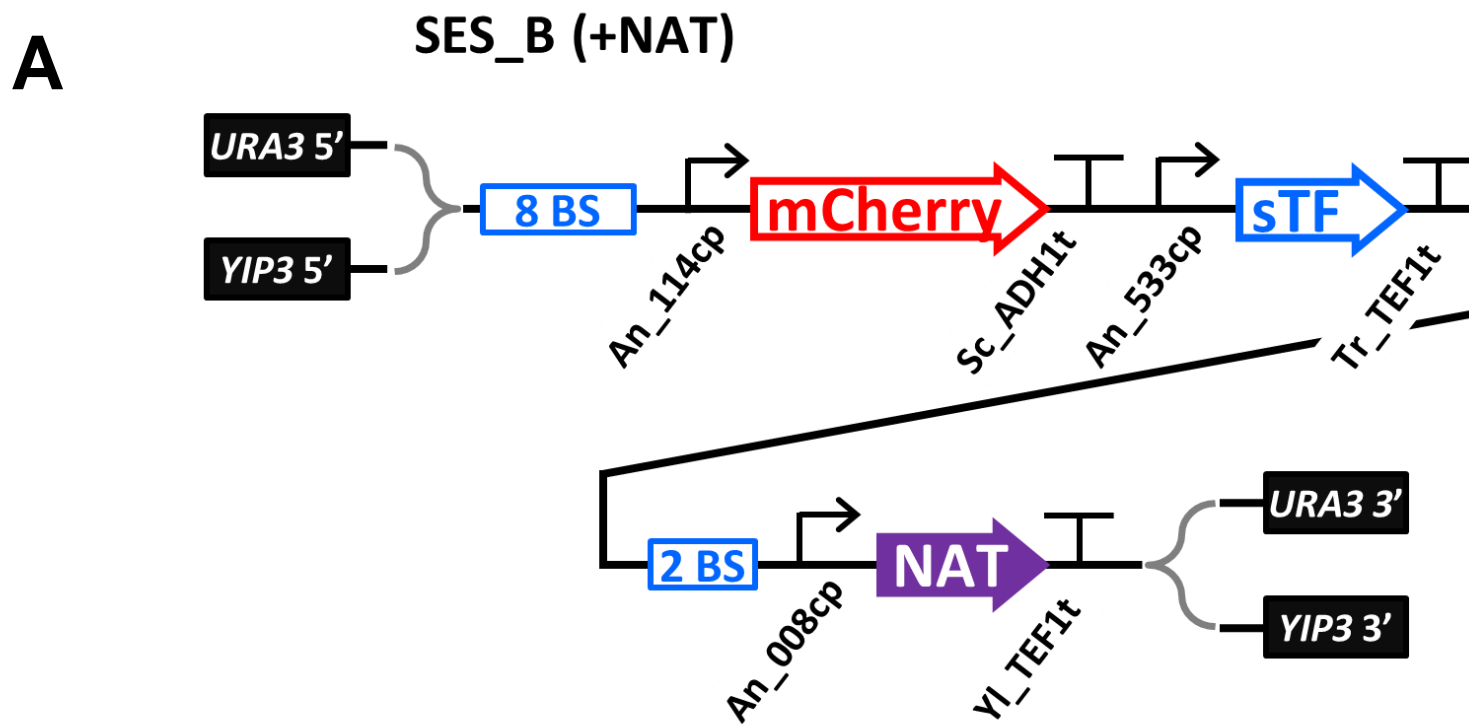

**B**

*Candida apicola*

*Zygosaccharomyces lentus*

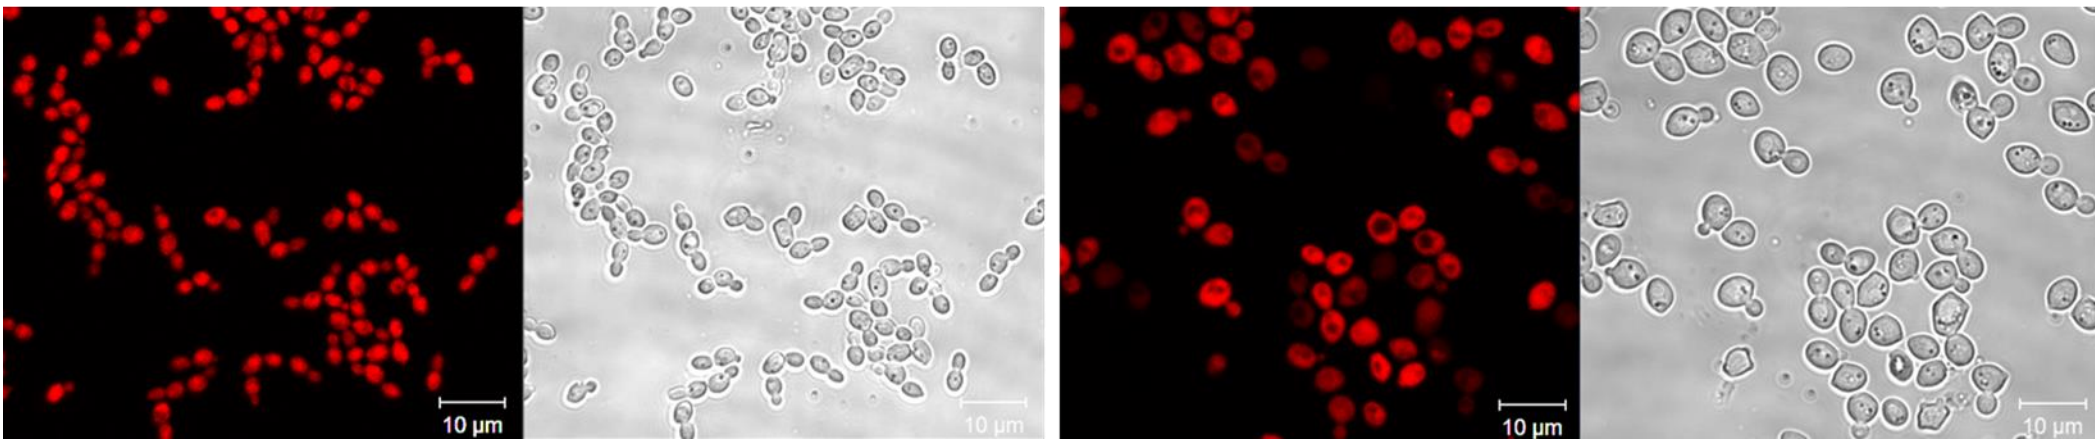

**C**

**SES in novel yeasts**

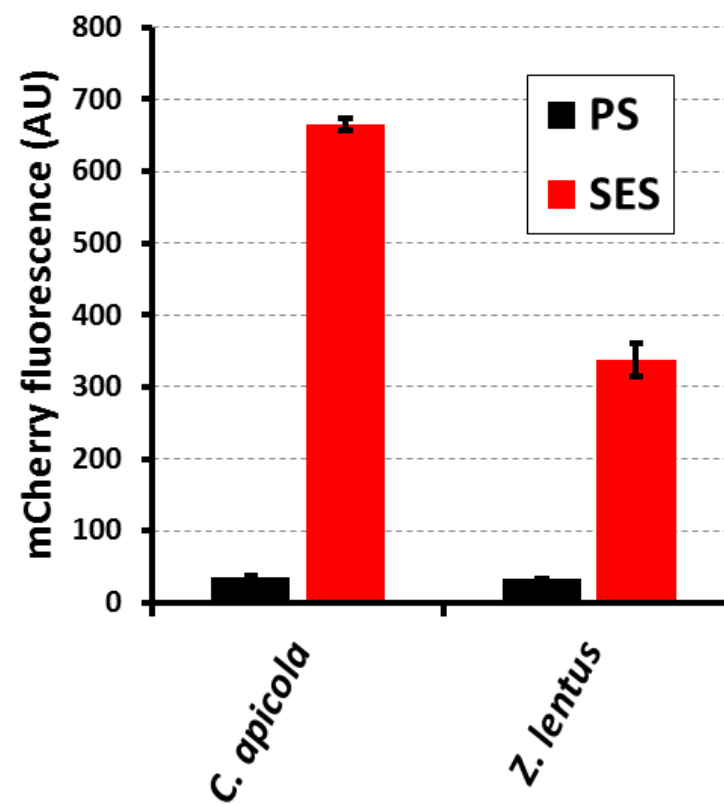

**Supplementary Figure 7**

Universal SES system for novel hosts.

### Supplementary Figure 7. Universal SES system for novel hosts.

- A) Schematic presentation of the SES cassettes (SES-B+NAT) used for *C. apicola* and *Z. lentus*. The selection marker and mCherry expression was controlled by the sTF (Bm3R1-NLS-VP16). The genome integration flanks are also indicated.
- B) Fluorescent microscopy of the two species harboring the SES-B (+NAT). Uniform mCherry fluorescence signal was observed and the corresponding bright field image is shown for both species. The micrograph acquisition settings and the contrast were adjusted to maximize the visualization of the red fluorescence.
- C) Quantitative fluorometry analysis of the mCherry expression in the yeast strains. The graphs show fluorescence intensity (mCherry) normalized by the number of cells. Values and error bars represent the mean and standard deviation from three independent cultivations. PS denotes parental strain (without SES).

Supplementary Figure 8

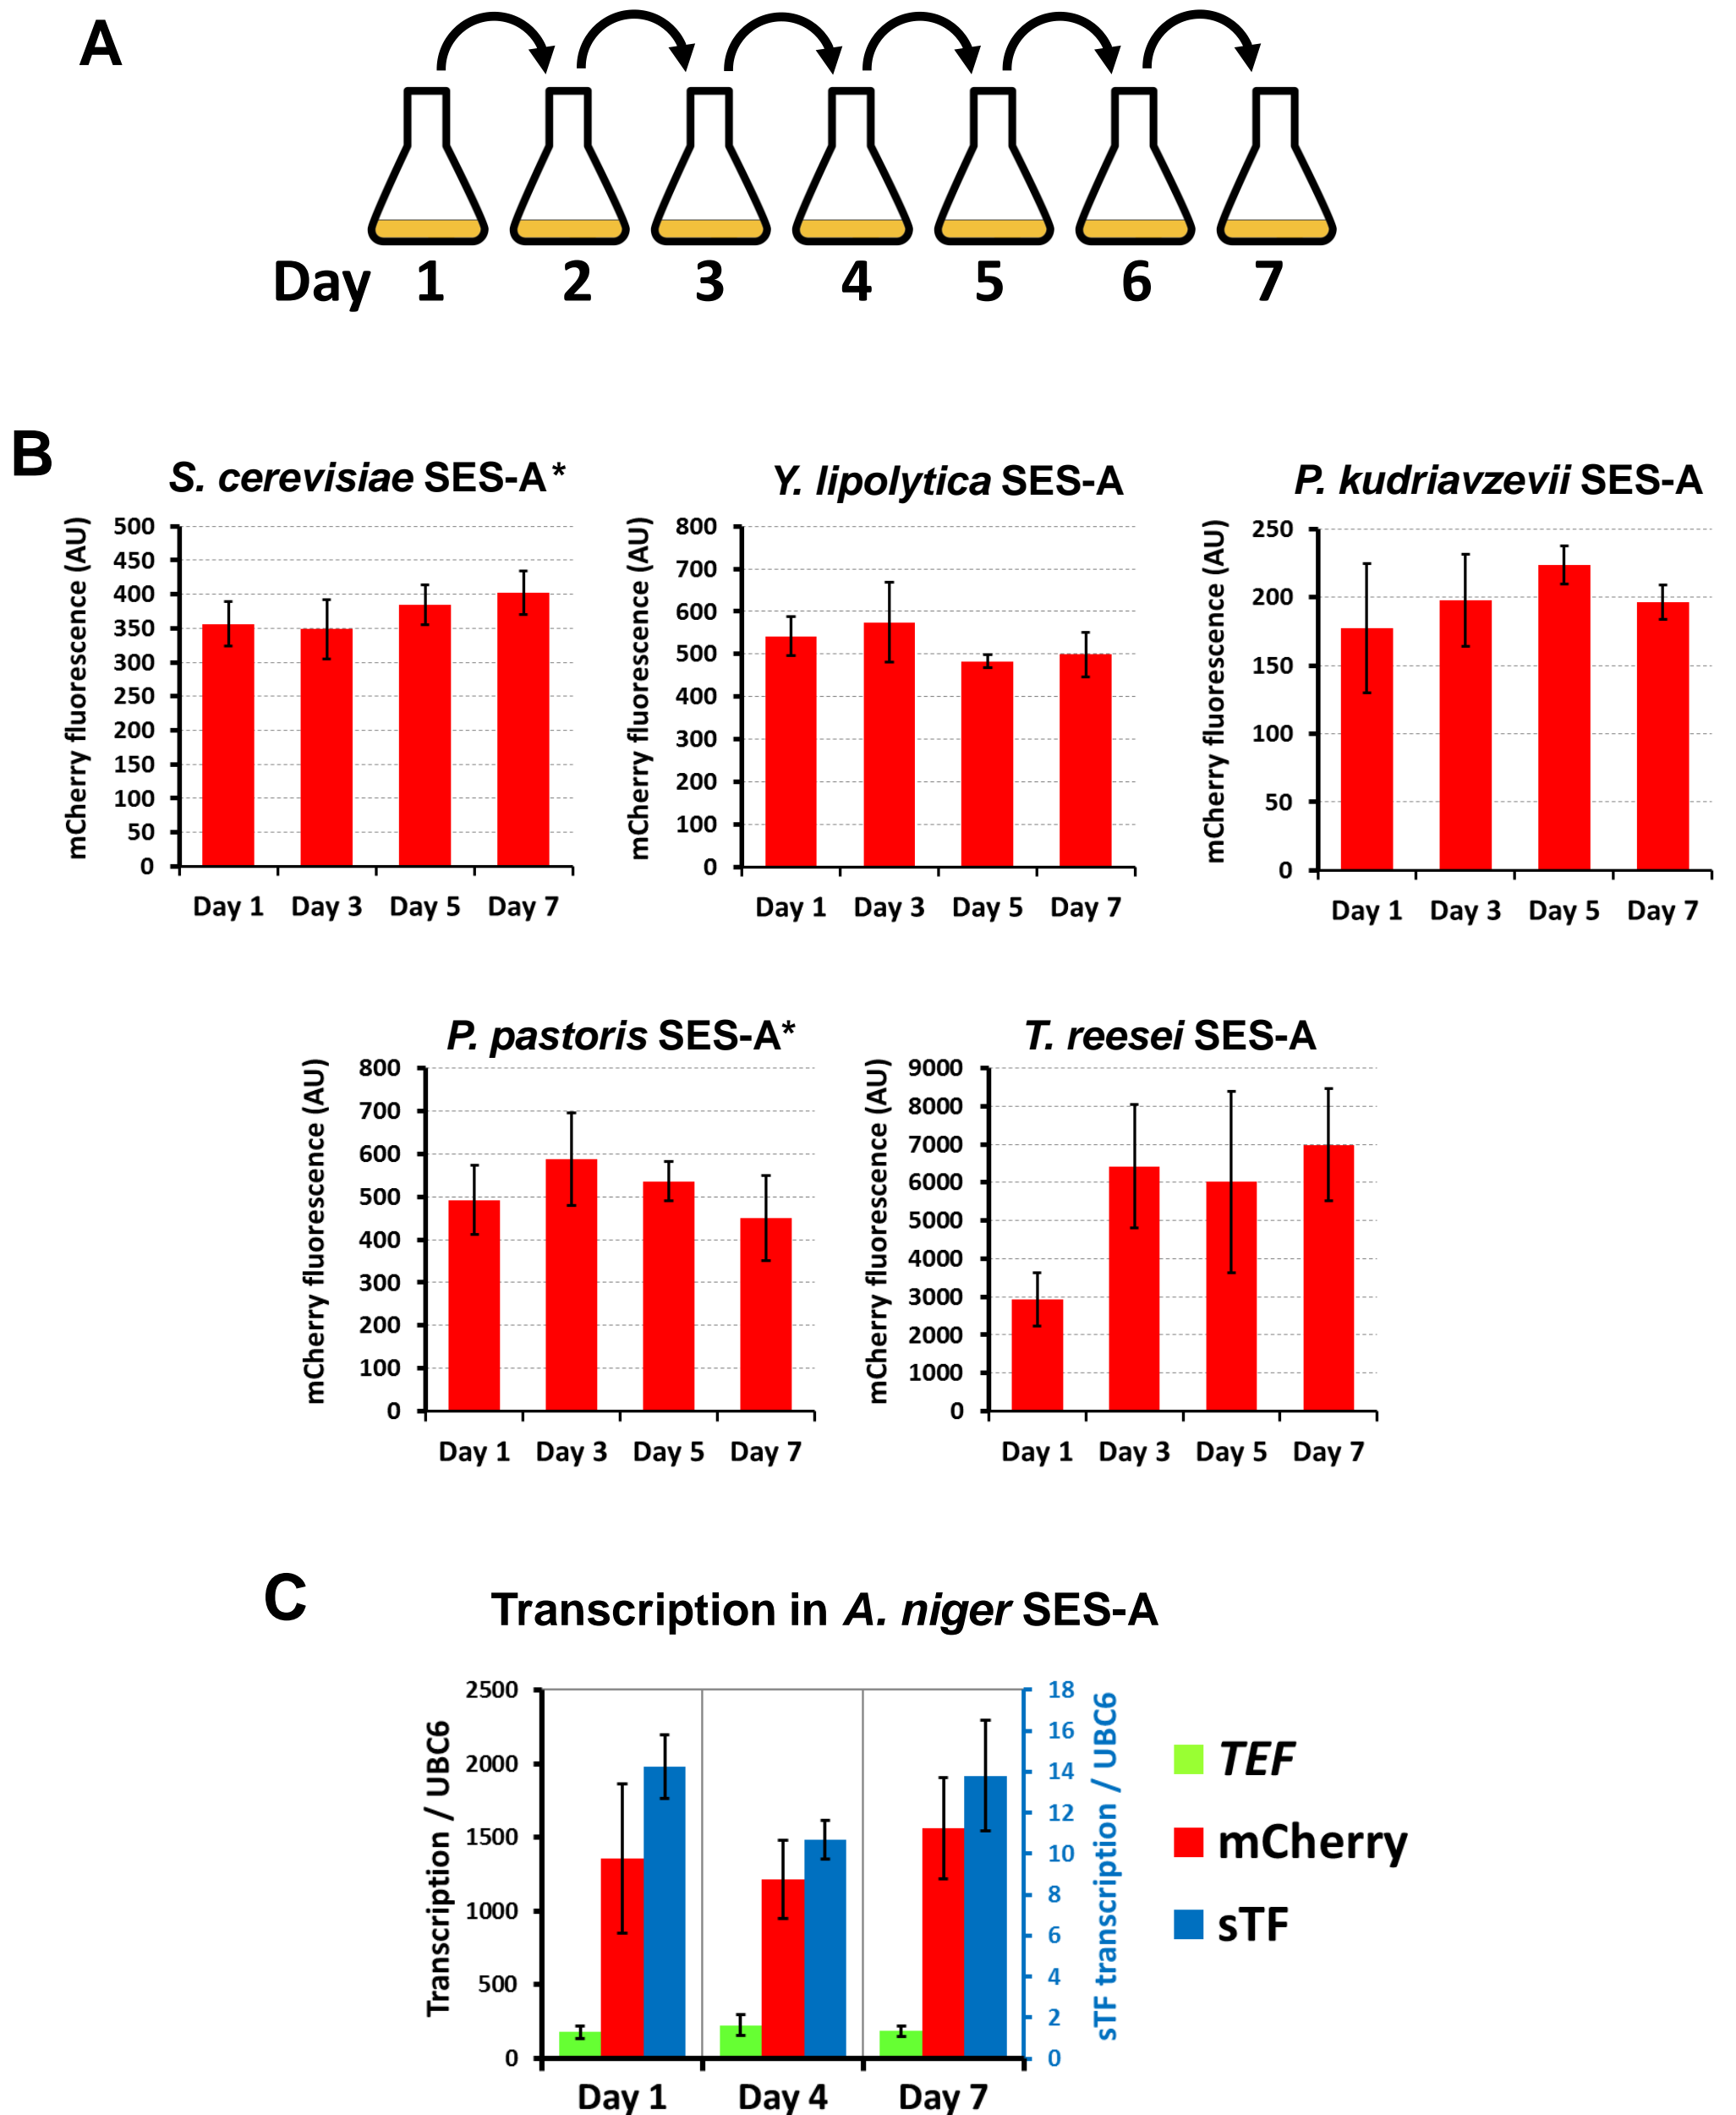

Supplementary Figure 8

Test of genetic stability of the SES system



### Supplementary Figure 8. Genetic stability test of the SES-A system in the fungal strains.

- A) Schematic presentation of the cultivations. The 24-hour cultures were diluted each day to a fresh medium (~1:160 for the yeast strains; ~1:20 for the filamentous fungi).
- B) Quantitative fluorometry analysis of mCherry expression in the yeast and *T. reesei* strains. The *S. cerevisiae* and *P. pastoris* strains contained the SES-A\* version with the *S. cerevisiae*-codon-optimized sTF. The *Y. lipolytica*, *P. kudriavzevii*, and *T. reesei* strains contained the basic SES-A system (with *A. niger* codon optimized sTF). The analysis was performed in days 1, 3, 5, and 7. The graphs show the fluorescence intensity (mCherry) normalized by the number of cells/mycelia in the suspension. Values and error bars represent the mean and standard deviation from at least three independent cultivations.
- C) Transcription analysis of the *A. niger* strain with the SES-A system. The analysis was performed in days 1, 4, and 7. The mCherry, the *tefA* gene, and the sTF (on the secondary y-axis) transcript levels were analyzed and normalized to signal of the *UBC6* homolog gene transcription. Values and error bars represent the mean and standard deviation from two biological (four technical) replicates.

## Supplementary tables

### Supplementary Table 1

Parental strains used in this study.

| Organism                        | Strain                                                                           | VTT code     | Source                   |
|---------------------------------|----------------------------------------------------------------------------------|--------------|--------------------------|
| <i>Saccharomyces cerevisiae</i> | CEN.PK111-32D                                                                    | H3891        | *                        |
| <i>Saccharomyces cerevisiae</i> | CEN.PK102-5B                                                                     | H3900        | *                        |
| <i>Saccharomyces cerevisiae</i> | CEN.PK102-3A                                                                     | H3899        | *                        |
| <i>Pichia kudriavzevii</i>      | ATCC 32196                                                                       | VTT C-79090T | VTT culture collection   |
| <i>Yarrowia lipolytica</i>      |                                                                                  | VTT C-00365  | VTT culture collection   |
| <i>Pichia pastoris</i>          | X-33                                                                             |              | Thermo Fisher Scientific |
| <i>Aspergillus niger</i>        | ATCC1015                                                                         |              | ATCC                     |
| <i>Trichoderma reesei</i>       | VTT strain based on M124                                                         | M2068        | VTT culture collection   |
| <i>Trichoderma reesei</i>       | <i>cbh1::mCherry</i> (native CDS of the <i>CBH1</i> replaced by the mCherry CDS) | M717         | VTT culture collection   |
| <i>Candida apicola</i>          |                                                                                  | VTT-C-87174  | VTT culture collection   |
| <i>Zygosaccharomyces lentus</i> |                                                                                  | VTT-C-09840  | VTT culture collection   |

\*Strains kindly provided by Dr. P. Kötter (Institute of Microbiology, J.W. Goethe University, Germany)

## Supplementary Table 2

Candidate core promoters tested in *S. cerevisiae* CP-screen (**Fig. 1C**). The shaded sequences (9bp) are regions added to the native core promoter sequences (replacing its original 9bp 3'-end sequence) for screening and cloning purposes. The ATG, start codon of the mCherry coding sequence, is underlined. Sc - *Saccharomyces cerevisiae* origin; An – *Aspergillus niger* origin; Tr – *Trichoderma reesei* origin.

| DNA sequences of the selected UCPs and other CPs used for constructing the expression systems |                                                                                                                                                                                                                     |
|-----------------------------------------------------------------------------------------------|---------------------------------------------------------------------------------------------------------------------------------------------------------------------------------------------------------------------|
| Sc-THI4cp                                                                                     | ATCATGAAATTGATTTTTGATTTTCAATTTATGAACTACCCAGATATATAAATATTGGAATAAATTGTGATTAAGTAGTCGGGAAATATCTTTATGTTCTCTTTCTTATCATCTAGAAATAATAAATCACAAACCAAAAAATCAACTAACTTAATTAATAATG                                                 |
| Sc-TEF1cp                                                                                     | CTCTTCGATGACCTCCATTGATATTTAAGTTAATAAACGGTCTTCAATTTCTCAAGTTTCAGTTTCATTTTTCTGTTCTATTACAACCTTTT TACTTCTTGCTCATTAGAAAGAAAGCATAGCAATCTAATCTAAGTTT TAATTAATAATG                                                           |
| Sc-PGK1cp                                                                                     | AAGGGGGTGGTTTAGTTTAGTAGAACCTCGTGAACTTACATTTACATATATATAAACTTGCATAAATTGGTCAATGCAAGAAATACATATTGGTCTTTCTAATTCGTAGTTTTCAAGTTCTTAGATGCTTCTTTTTCTTTTTTACAGATCATCAAGGAAGTAATTATCTACTTTTTACAA CAAATTAATTAATAATG              |
| An-201205cp<br>(An_201cp)                                                                     | TTCTCTTTCTTAAGAATATGTTCAAAGACTAGGATGGATAAATGGGGTATATAAAGCACCTGACTCCCTCCTCCAAGTTCTATCTAACCA GCCATCCTACACTCTACATATCCACCAATCTACTACAATTATAATTAATAATG                                                                    |
| An-53301cp<br>(An_533cp)                                                                      | CGCCCAAGAGAGCTGAAGATGCTGAGTAGGGTGTCCAGGCAGCACATATATAAGATGCTTCGTCCCTCCCCTCGAGTCTTCTTTTCTC TCTCATCAATCACTCTACTCTACTCTACCTTAACTCTTCACTACTTACATATAATTAATAATG                                                            |
| An-205017cp<br>(An_205cp)                                                                     | TATAGTACTATTGATTAGTATTGTTGTTGGATGTGCTGGTAGGTGTGTAGTATATATAGGAGATAGTAGAGGCAGATGATGATGATGGT ACTATTTTGAATCACCTCAAACGATACTATTCGCATCTTTGATAAAGATATCAAGAAACCAGAACAAATCATTACTACTCTCCATAAGGATATA TATACTTTACATCTTAATTAATAATG |
| An-00850cp<br>(An_008cp)                                                                      | AACCCAAAGTAATAAGTCTGTAGTAATTGGTCTCGCCCTGAATTCAAACTATAAATCAACCACCTTTCCCTCCTCCCCCGCCCCACTTGG TCGATTCTTCGTTTTCTCTACCTTCTTCTATTCTGGTTTTCTTCTTTTATTTTCCCTCTCCCATCAATCAAATTCATATTTGAAAAAATTA ACATTAATTAATAATG             |
| An-1114556cp<br>(An_111cp)                                                                    | GGGCGGAAACTTGAACTGGACGCCTTGTAACGGCGTATGTTGATATAAGGAACCAAGTCCCGCTGTAGTCTTCGGTTCATCAGACC CAGCACAGCACAGCAACACAACATTACAGCATAGCAAGCACTTCTATATTTCTACACATCACAGCACATTTCTATACAGTTTACGTCTAAT TATCTCCTGTTAATTAATAATG           |
| An-1147651cp<br>(An_114cp)                                                                    | GCCCTGCAGTGCCTGATCACCTTATCAAGTGGCCAAATATCCACTATAAAAAGGCTTGGGAACCCCTCGTTCTGTCTTACCTTCTATCATCTT ACCAAATCCACTCCTCTTCTTATACATCAATCTTACCAATCAACTACCTTACAACCTCAATACACTTAATTAATAATG                                        |
| An-1178623cp                                                                                  | GGTACTCGGGTTTTAAGCCGCTTAAAAGCCGACACGAATTAGTTATAAAAAGACTCTGTACTTGAGCAGGATATTCCCTTATTCTTTTTCATT TAGATTGATATCGAATTCATTCTACAAGGATCGGATACTCTTCCATCCTTTATTTTGTCTGTGAATCAAACCTTAATTAATAATG                                 |
| An-11310cp                                                                                    | AATTCTGCTTCTTTTGGCGACTCAGGATCAACTGAGTATTTGCGAGCTAGTATAAGTAGCGCGCTCCCTCGTCAACCGCTCTCCCTATTCT TATCCTCATCTTCACTCTATCTCTGTGCGACGCCAACGCAACCACCGTATCCTATACCCTTATCACAACCTTTCTTACCTTTACACCTAATCTC AAAATTAATTAATAATG        |

|                           |                                                                                                                                                                                                                                         |
|---------------------------|-----------------------------------------------------------------------------------------------------------------------------------------------------------------------------------------------------------------------------------------|
| An-57241cp                | AGGTAATGAATATTGGTTGCTGGCGGGCTGATCTTCTCCGACACGTCTATATAAACTGGTCACCTTCTGGCCCTCCTTTCTATCTCTCTCTCATCATCAGTCTCAAACAAGCCTCTTTCTCTCCTACCTTCACTCTCCACTTTCTCCTTTGAAAGGGATAAAACTCTCCTCCTCATTCTCACCTATATACCTTGCTTTAATTAATAATG                       |
| An-06590cp                | GATTCTAGAAATTTCTGCCCTTACTTGCCTCCCTCTTGCAACAAATATAAGAGACTCCAATTCCTTCTCTGATTCCAACATTTTTCTCTCCACTTCAGAACCATCTGAAGGAGCTTGGCTGCTCGCTTCTTCTTCTTCTTCTTACTAACATCCCTACCCCTCTAGAAAACCAAGTCTCTCCTCTTAATTAATAATG                                    |
| An-53540cp                | GCGCTGGTCAGCTGGGTCTCAGCTTACTTTTTCTCTGATCACGTAGGGTATATCGGTGGAATCTGGGTGGCGAGGAAGCCTGAATCCTCAACATAAATAGGGCCACTCCCTCTCCCTCTTTCTGTAAACAAACACACTAGACACCGACGACACTTTCTCTCCAAGTCAAATCCTGACAGATCTTCTCGCTAAAGAGGCAATAAAGAAGAAGTCTCGCTTTAATTAATAATG |
| An-1141688cp              | ACTTGGATGATGGAGGAGTTGATCGAGGTCAATGAGGAGAGGCTTCAAGTATAAGAAGAGACTGCTCGACCAGCAGAATGGATCTTGTTCATCAACCAAGAGTCCAAGGCTTCTTGTCTGGTCTATCTTCTCCGAAGTCTTGTGCTTCTCTTAATTAATAATG                                                                     |
| An-07850cp                | CGTCCCCAGGTTTTGGGTAGAAATGGAATATCATTAGATCTGCTGCTTATATTGTTATTTAGAGAGATAAAGTACGACCAATCCCTGCACACATCTCGACAGGATGTGAATTGTTCCAAAAAATGGCACCATTGGTTAGCCAGCCACACACAGTGACTAACGCGCGTGATGATGAATAGATCCAGAAGTTAATTAATAATG                               |
| An-11300cp                | GGTATCTGAAAGGCTCCCGGTAGTCCAACGTCACTCTGATCGCTTGTATATATGCTCCGCTCCCTCGCTTGGCGGTCAACCCCTTGCACCATATCACGCTTATCGCCATCGTCACTTGTAACTACAACCTCCCTAATAAATTAACACCTTCAAAGGAAAAAAAAAAACCTCACATACCATTAATTAATAATG                                        |
| An-138407cp               | GGAGGGCAAGTCTGGTGCCAGCAGCCGCGTAATTCCAGCTCCAATAGCGTATATTAAGTTGTTGCAGTTAAAAAGCTCGTAGTTGAACCTTGGGTCTGGCTGGCCGGTCCGCTCACCGCGAGTACTGGTCCGGCTGGACCTTTCCTTCTGTTAATTAATAATG                                                                     |
| An-14130cp                | GTGGCTCCGGTGTGCGCGCGGGAGGCTCGCAACTGCCCGCAGTCCGTATAAGTTGTAGTTTATACCTCGCTCTCCTCCGCTCAATCGTCCACCTTCCGTCGACACTATCTCCCTGCTTTAATTAATAATG                                                                                                      |
| An-1158310cp              | CGGTACGGCAGGGCACGCGGGTAACATGAGGGGTGGTCTACTATATAAGTCCATCGAGTGATGCACAACGCCAACTACAGCTTCGCAACACACATATCCCATTAATTGAAAGTTATAGACACATATACTTACAGATCAGTCAAGTACATCTACCACACCCCTGAACCCAACCCCAAACTAACAGCATTAATTAATAATG                                 |
| Tr-112258cp<br>(Tr_112cp) | CACATCTTGGAGATCAGTTGCAGTCTATTCATTGAGGCTCAACATATAAAGTGGGATACTTCCAACAGATGATAGTTGTCAAACAACCTCTTTGATCCTACAAATTTGGCCAAAGACACACAAGACGCTCACATCTCCTACCTAACCAAACAAAGAAAAAACATCCACCAACTTAATTAATAATG                                               |
| Tr-123236cp<br>(Tr_123cp) | ATCTTACAAAGTTGCTTGGCAGTAAACCGTGCAATGGACACCAGGTATAAAGTCAAGTATATCCTCCCGAATTCAAAGTTTCATACCAAGCTCCTCAATCAACTTACTTGAACAATACTACAAACAACCAACCTCATTCAACAACCTTAATTAATAATG                                                                         |
| Tr-123989cp               | TAAACGGAATGAGCTAGTAGGCAAAGTCAAGCAATGTGTATATAAAGTTGAGGTCCTGCCTCCCTCATGCTCTCCCATCTACTCACTCAACTCAGATCCTCCAGGACTTGTACACCATCTTTGAGGCACAGAAACCAATAGTCAACCGCGACTTAATTAATAATG                                                                   |
| Tr-119989cp               | AACAGCTGCGAGAGCTGGAAGATGAAGAGGGCCAGAAAAAAGTATAAAGAAGACTCGATTCCCGCCATCCAACAATCTTTCCATCTCATCAGCACACTCATCTACAACCATCACCACTTCACTCAACTCCTCTTCTCAACTCTCCAAACACAACATCTTTGTTGAATACCAACATCACCACTTAATTAATAATG                                      |
| Tr-123232cp               | GGTCTGGATGAAACGCTTGGCCAAATCGTGATCGATTGATACTCGCATATAAAGTGGACAGATCGACTCTTGATTACAGACATCCGTCAGCCCTCAAGCCGTTTGAAGTCCACAACACAAGCACAAGCATACTTAATTAATAATG                                                                                       |
| Tr-73638cp                | CCGGCACAATCAGGAGCAACAGGCACTGCAAAATGACCTGGCAGTATATAGACCTGACCGTATGAGTCTATTGTAGACATTCTAGCTAAGAGATCCGAGCCTAGTTCATAATACAGTAGTTGAGTTCATAGCAACTCACTCTAGCTGAACAAATTATCTTAATTAATAATG                                                             |

|             |                                                                                                                                                                                                 |
|-------------|-------------------------------------------------------------------------------------------------------------------------------------------------------------------------------------------------|
| Tr-123818cp | GAGACGAGGCAAGCTTGATGAGGCCAAATTATCCGTCAACTGTCTATAAAGGAGCCCATGCCAAACCCCCCTAAAGACTCAAGAAGCCAAACCTGAACAACCCAGCACCTGAACAGTCATACAACCCCTCCAAGCCCAAAGACACAACAACCTCTACTAGCTGAAGCAAGAAGTTAAATTAATG        |
| Tr-123979cp | CAGCAGTGAAGAAGAGGGGAAGAAGATAAACCTGTAGGTTGGACAGAGTGTATAAAGGGAGGGCTGTGCCAACGAGGAGCGAGATTAACCTTTGGATTTGGAGCAGAACAATATTGGAATCACAGAAGAAGGATCTCTGTCTTAATTAATG                                         |
| Tr-69465cp  | GAAAAATGGTGAGGAGATCTGCCTTCGAGTGCCTGTAGAAAAATGTATATAAGGATGTGTTTCACTCAACTGTCTTAAGAATCGGTTCTCTAGCCGCGCTTCAATTACTTCGAGACTTTTCGCTTAAATCGCCCTGCCATTAATTAATG                                           |
| Tr-49976cp  | TGCCCTGGCGTTGCAAGCCGCTACAACCTGCCCTTTACCTAGGTATAAAGACCTGTAGTAACCACTACTATTGCAATCTTCTTCCAGGTGGCATCTATTCTATCTTACACAAGGGCGTCAACTAATTGACTTGATCTTCCATCTCGTGTCTTGTGTAACCAATTAATTAATG                    |
| Tr-123946cp | CTGTTAGGCTGTGAGTTATAAAGTTGATGATTGGGTGAGGTTGTCAATGTACAGAGCATCTTACCTCTCAGCTTCAATCTTACCTACACGCTTCTCAATCTTGAACACCAATTGTTGCTCTAGCGCTATCCTTCACTCATCACTCGCTCGTACACTAACTTCTATCCCGAACAGACACGGCTTAATTAATG |
| Tr-79202cp  | GGACGGCGTCTCCTCATCACAGCGAGTGCAGCACCTGCAACTATACTATGGCAGTCACCGAGACTCAGACAACGGTGAAGACGCAATCGAGATTGAGATCTGACGCAAACTGGCCGTCAAGATGCTGCTGTCCAGAGCCAGAAGCCGAGAGCCGTAGCCTGTAATTAATG                      |
| Tr-121350cp | GGTGAGGCTCTAACCCCTCTGAGGAGCGTGGCAGCTGAAGCTTATAAATAGCCCTTGTCTCCCTCAGAAACCTTCTCTTCTTCTCCCTTCAAGCAAACCTCTCACACAACCCACACAACACTCAACTTCTTCAATTAATG                                                    |
| Tr-123009cp | AGTTGTGGTTTTGGTCTCGATTTGGGGTATATAAGGCGTGAGGATCCCGGTTGATGGAAATTTGGATTTTCTGTCTTCTTACGCGAGAAAATCGAGGGTTGCTGAGATACTGTTCCCGCTTGTCTATAACTTCTTCTTTTTTTTGTCTTTTGGCCTTTAACGTTCTTGAAGGCGTTGGTTTAATTAATG   |
| Tr-120311cp | ATTCCAGTTTGGGATAGCGTGGCTCAGGAGAGCGAACACGAAATTATAAAGAGGCCATGGCGAGCTCCCTGGGGAGATTCTGCTGTATCACAAACCAACATTTCAAAGTTTACAACCTCTTGAACACCTTCCCTTGCAATCGACTTAATTAATG                                      |
| Tr-107784cp | AGCTGGGCTTGAATCGATCATACTGCAGCCATAAGAGCAAGGGATATAACTAGAAAGATGTCTCGAACTCGATAGAGAGAGGAAAATTTTCGACGACAAACAACAATCTGAGCACGAGACTACAGACAACCGCATTCGACGGCTCCATACATCAGAACTACTTTCCGCTTGGATTAATTAATG         |
| Tr-80980cp  | GTAATACCTGAAAGCAAGGAAAAGAGAATTCGCACCGGAGATGGATATAAAGCTTGCCTGGTGGCAGCAATGAAGGGTCAATCTCAGAGCTCATCAGATCACCACTCGACAACCTCTCAACATTTGCTAGTTCCTATTCTAGGCGTACCTTCTCAATCAATATCAACATCATTAATTAATG           |



### Supplementary Table 3

DNA sequences of mCherry, *CBH1* and sTFs. The part of the sTF encoding the DNA-binding protein (Bm3R1) is codon-optimized for *A. niger* (A.n.) or *S. cerevisiae* (S.c.). The *cbh1* sequence is identical to the *T. reesei* genome sequence of the gene (contains introns).

| Gene                         | Sequence                                                                                                                                                                                                                                                                                                                                                                                                                                                                                                                                                                                                                                                                                                                                                                                                                                                                                                                                                                                                                                                                                                                                                                                                                                                                                                                                                                                                                                                                                                                                                                                                                                                                                                                     |
|------------------------------|------------------------------------------------------------------------------------------------------------------------------------------------------------------------------------------------------------------------------------------------------------------------------------------------------------------------------------------------------------------------------------------------------------------------------------------------------------------------------------------------------------------------------------------------------------------------------------------------------------------------------------------------------------------------------------------------------------------------------------------------------------------------------------------------------------------------------------------------------------------------------------------------------------------------------------------------------------------------------------------------------------------------------------------------------------------------------------------------------------------------------------------------------------------------------------------------------------------------------------------------------------------------------------------------------------------------------------------------------------------------------------------------------------------------------------------------------------------------------------------------------------------------------------------------------------------------------------------------------------------------------------------------------------------------------------------------------------------------------|
| mCherry                      | ATGGTGAGCAAGGGCGAGGAGGATAACATGGCCATCATCAAGGAGTTCATGCGCTTCAAGGTGCACATGGAGGGCTCCGTGAAC<br>GGCCACGAGTTCGAGATCGAGGGCGAGGGCGAGGGCCGCCCTACGAGGGCACCCAGACCCTCAAGCTGAAGGTGACCAAGGG<br>TGGCCCCCTGCCCTTCGCTGGGACATCTGTCCCTCAGTTCATGTACGGCTCCAAGGCCTACGTGAAGCACCCCGCGACATCCC<br>CGACTACTTGAAGCTGTCTTCCCCGAGGGCTTCAAGTGGGAGCGCGTGATGAACTTCGAGGACGGCGCGTGGTGACCGTGACC<br>CAGGACTCCTCCCTGCAGGACGGCGAGTTCATCTACAAGGTGAAGCTGCGCGGCACCACTTCCCCTCCGACGGCCCCGTAATGCA<br>GAAGAAGACCATGGGCTGGGAGGCCTCTCCGAGCGGATGTACCCGAGGACGGCGCCCTGAAGGGCGAGATCAAGCAGAGGC<br>TGAAGCTGAAGGACGGCGGCCACTACGACGCTGAGGTCAAGACCACCTACAAGGCCAAGAAGCCCTGACGCTGCCCCGCGCCT<br>ACAACGTCAACATCAAGTTGGACATCACCTCCACAACGAGGACTACACCATCGTGGAACAGTACGAACGCGCCGAGGGCCGCCA<br>CTCCACCGGCGCATGGACGAGTTATACAAGTAA                                                                                                                                                                                                                                                                                                                                                                                                                                                                                                                                                                                                                                                                                                                                                                                                                                                                                                                                                                   |
| Bm3R1<br>(A.n.)-NLS-<br>VP16 | ATGGAGTCCACACCACGAAACAAAAGCTATTTTTCTGCCTCGCTCCTTCTGTTCCGCGAACGCGGGTTTGACGCCACTACGATG<br>CCGATGATCGCTGAAAATGCTAAGGTGCGCGCAGGAACGATTTACCGATACTTTAAGAATAAGGAGAGTCTGGTCAACGAGCTGT<br>TCCAGCAGCAGCTTAATGAATTTTTGCAATGTATCGAGAGTGGCTTGGCGAACGAAAGGGACGGTTATCGCGATGGTTCCATCAT<br>ATCTTCGAGGGAATGGTCACTTCAAAAGAACCATCCGCGCGCTTGGGATTTATCAAGACACATTCCAAGGTACATTCCTAAC<br>GAAGACTCACGCTTGCATACAAAACCTTGTGAGTCTGTGCACCTTCTTCGAGAGGGACAGAAACAGGGCGTAATTCGAAA<br>CTTGCCCGGAATGCCCTGATCGCCATCCTATTCCGATCGTTTTATGGAGGTCTATGAGATGATCGAAAACGATTTCTCTCTAAC<br>GGATGAGTTGCTTACGGGGTAGAGGAATCGCTCTGGGCTGCTCTCTCCGACAATCGGCTAGCCCTCCAAGAAGAAGCGCAAG<br>GTCAGCACGGCCCCCCCCACGGACGTCTCCTCGGCGACGAGCTCCACCTGGACGGCGAGGACGTGCGCATGGCCACGCCGACG<br>CCCTCGACGACTTCGACCTCGACATGCTGGGCGACGGCGACAGCCCCGGCCCCGGCTTACCCCCACGACTCCGCCCTACGGC<br>GCCTGGACATGGCCGACTTCGAGTTGAGCAGATGTTACCAGCAGCCCTGGGCATTGACGAGTACGGCGCGCTGA                                                                                                                                                                                                                                                                                                                                                                                                                                                                                                                                                                                                                                                                                                                                                                                                                                    |
| Bm3R1<br>(S.c.)-NLS-<br>VP16 | ATGGAATCTACTCCTACTAAGCAAAAAGCCATCTTCTGCTCCTTGTGTTGTTGCTGCTGAGAGAGGTTTCGACGCTACCACTATGC<br>CAATGATTGCCGAAAACGCTAAGGTTGGTGTGGTACTACTACAGATACTTCAAGAACAAGAATCCTTAGTTAATGAGTTGTTTC<br>AACAACAGCTCAATGAATTTTTGCAATGTATCGAATCTGGTTTGGCTAACGAAAGAGATGGTTACAGAGACGGTTCCACCACATC<br>TTCGAAGGTATGGTACCTTACCAGAACCCTAGAGCCTTAGGTTTCAAGACCCACTCTCAAGGTACTTTTTGACCGAA<br>GAATCCAGATTGGCTTATCAAAAGTTGGTCAATTTGTCTGTACTTTCTCAGAGAAGGTCAAAGCAAGGTGTCATCAGAAATTT<br>GCCAGAAAACGCTTTGATTGCTATCTTGTTCGTTCTTTCGGAAGTCTACGAAATGATTGAAAACGATTTTGTCTTTGACTGAT<br>GAATTTAACCCTGTTGAGGAATCCTTGTGGCTGCTTGTCTGCTCAATCTGAATTCCTCCAAGAAGAAGCGCAAGGTGATCAG<br>CACGGCCCCCCCCACGGACGTCTCCTCGGCGACGAGCTCCACCTGGACGGCGAGGACGTGCGCATGGCCACGCCGACGCCCTC<br>GACGACTTCGACCTCGACATGCTGGGCGACGGCGACAGCCCCGGCCCCGGCTTACCCCCACGACTCCGCCCTACGGCGCCCT<br>GGACATGGCCGACTTCGAGTTTGAAGCAGATGTTACCAGCAGCCCTGGGCATTGACGAGTACGGCGCGCTGA                                                                                                                                                                                                                                                                                                                                                                                                                                                                                                                                                                                                                                                                                                                                                                                                                                        |
| LexA-NLS-<br>VP16            | ATGAAAGCGTTAACGGCCAGGCAACAAGAGGTGTTGATCTCATCCGTGATCACATCAGCCAGACAGGTATGCCGCCGACGCGTG<br>CGGAAATCGCGCAGCGTTTGGGGTCCGTTCCCCAACGCGGCTGAAGAACATCTGAAGGCGCTGGCAGCAGAAAGCGTTATTGA<br>AATTGTTTCCGGCGCATCACGCGGATTCGTTGTTGAGGAAGAGGAAAGAAGGTTGCCGCTGGTAGGTCGTGTGGTCCCGGT<br>GAACCACTTCGGCGCAACAGCATATTGAAGGTCAATATCAGGTCGATCCTTCTTATTCAAGCCGAATGCTGATTTCTGCTGCGC<br>GTCAGCGGGATGTCGATGAAGATATCGGCATTATGGATGGTGACTTCTGCGCAGTGCATAAAACCTCAGGATGATACGTAACGGTC<br>AGGTCGTTGTCGCACGTATTGATGACGAGGTTACCGTTAAGCGCCTGAAAAACAGGGCAATAAAGTCAAGTCTGTTGCCAGAAAA<br>TAGCGAGTTTAAACCAATTGCTGATGATCTTGTGACGAGACTTACCATTGAAGGCTGCGGTTGGGTTATTCCGCAACGGCG<br>ACTGGCTGGAATTCCTCCAAGAAGAAGCGCAAGGTGACGACGGCCCCCCCCACGGACGTCTCCTCGGCGACGAGCTCCACCT<br>GGACGGCGAGGACGTGCGCATGGCCACGCCGACGCCCTCGACGACTTCGACCTCGACATGCTGGGCGACGGCGACAGCCCCGG<br>CCCCGGCTTACCCCCACGACTCCGCCCTACGGCGCCCTGGACATGGCCGACTTCGAGTTTGAAGCAGATGTTACCAGCAGCCCT<br>GGCATTGACGAGTACGGCGCGCTGA                                                                                                                                                                                                                                                                                                                                                                                                                                                                                                                                                                                                                                                                                                                                                                                           |
| <i>cbh1</i>                  | ATGATCGGAAGTTGGCCGTATCTCGCCCTTCTGGCCACAGCTCTGCTCAGTCCGCTGACTCTCCAATCGGAGACTACCCG<br>CCTCTGACATGGCAGAAATGCTCGTCTGGTGGCACGTGCACTCAACAGACAGGCTCCGTGGTATCGACGCCAACTGGCGCTGGA<br>CTCACGCTACGAACAGCAGCAGCAACTGCTACGATGGCAACACTTGGAGCTCGACCCTATGCTCTGACAACGAGACCTGCGCGAA<br>GAACTGCTGTCTGGACGGTCCGCTACGCTCCACGTACGGAGTTACCAGAGCGGTAACAGCCTTCCATTGGCTTTGTACCC<br>AGTCTGCGCAGAAGAACGTTGGCGCTCGCCTTACTTATGGCGAGCGACACGACTACCAGGAATTCACCTGCTTGGCAACGAG<br>TTCTTTTCGATGTTGATGTTTCGAGCTGCCGTAAGTGACTTACCATGAACCCTGACGCTATCTTCTTGTGGTCCAGCTGACT<br>GGCCAATTCAAGGTGCGGCTTGAACGAGCTCTACTTCTGTGTCATGACGCGGATGGTGGCGTGAGCAAGTATCCCAAC<br>ACCGCTGGCGCAAGTACGGCACGGGTTACTGTGACAGCCAGTGTCCCGCGATCTGAAGTTTCAATGACCAGGCAACGTTG<br>AGGGCTGGGAGCCGTATCAACAACCGCAACAGGGCATTGGAGGACACGGAAGCTGCTGCTGAGATGGATATCTGGGAGG<br>CCAATCTCATCTCGAGGCTCTACCCCCACCTTGCACGACTGTGCGCCAGGAGATCTGCGAGGGTATGGGTGGCGGGA<br>TACTCCGATAACAGATATGGCGGCACTTGCATCCGATGGCTGCGACTGGAACCCATACCGCTGGGCAACACAGCTTCTACGG<br>CCCTGGCTCAAGCTTACCCTCGATACCAACAAGAATGACCGTTGTACCCAGTTGAGAGCTGCGGTGCCATCAACCGATACTA<br>TGTCCAGAATGGCGTCACTTCCAGCAGCCCAACCGCGGATTTGGTAGTTACTCTGGCAACGAGCTCAACGATTAATCAAC<br>CTGAGGAGGCAAGTTCCGCGGATCCTTCTCAGACAAGGGCGGCTGACTCAGTTCAAGAAGGCTACCTTGGCGGCATGGT<br>TCTGGTCATGAGTCTGTGGGATGATGTGAGTTTGTGAGCAAAACATGCGCGTTGACAAAGAGTCAAGCAGCTGACTGAGATGTTA<br>CAGTACTACGCCAACATGCTGTGGCTGGACTCCACCTACCCGACAACGAGACCTCTCCACACCCGGTGGCGTGGCGGAAGCTG<br>TCCACAGCTCCGGTGTCCCTGCTCAGTCTCAATCTCAGTCTCCAAACGCAAGGTACCTTCTCAACATCAAGTTCCGACCCAT<br>TGGCAGACCCGGCAACCTAGCGCGGCAACCTCCGCGGAAACCCCTGGCACCAACCAACCCAGCCGCGCCAGCCACTACC<br>ACTGGAAGCTCTCCCGGACCTACCCAGTCTACTACGGCCAGTGGCGGATTTGGCTACAGCGGCCCCACGGTCTGCGCCAGCG<br>GCACAACCTGCCAGTCTGAACCTTACTACTCTCAGTGCCTGTA |

### Supplementary Table 4

Sequences of sTF binding sites. The Bm3R1 binding sites are used in all SES constructs, the LexA binding sites are used in the centromeric plasmid in the *S. cerevisiae* CP screen.

| Binding site | Sequence              |
|--------------|-----------------------|
| Bm3R1 ver 1  | CGGAATGAACATTCATTCCG  |
| Bm3R1 ver 2  | CGGAATGAAGGTTTCATTCCG |
| Bm3R1 ver 3  | CGGAATGAACTTTCATTCCG  |
| LexA ver 1   | CTGTATGTACATACAG      |
| LexA ver 2   | CTGTATATATATACAG      |
| LexA ver 3   | CTGTATGCGCATACAG      |
| LexA ver 4   | CTGTATATATATACAG      |

## Supplementary Table 5

Selection markers, integration loci, and length of the integration flanks which were used in transformations of different host organisms.

| Host organism (SES versions and/or control-promoter system versions)                                | Used selection marker (selection condition) | Integration locus (ID/database)          | Length and target location of 5' integration flank | Length and target location of 3' integration flank |
|-----------------------------------------------------------------------------------------------------|---------------------------------------------|------------------------------------------|----------------------------------------------------|----------------------------------------------------|
| <i>S. cerevisiae</i><br>(SES-A, -A*, -A-NC, -B, -B*, -B-NC, Sc_PGK1p, YI_TEF1p, Pp_GAP1p, An_gpdAp) | LEU2<br>(absence of Leucine)                | LEU2 (protein ID in JGI*: 626)           | 52 bp (-82 to -30 bp upstream of start codon)      | 50 bp (+1 to +50 bp downstream of stop codon)      |
| <i>P. pastoris</i> (SES-A*, -A-NC, -B*, -B-NC)                                                      | <i>ble</i><br>(100 µg/ml Zeocin)            | AOX promoter (protein ID in JGI*: 40209) | 463 bp (-527 to -64 bp upstream of start codon)    | 413 bp (-940 to -528 bp upstream of start codon)   |
| <i>P. pastoris</i> (GAP1p)                                                                          | <i>ble</i><br>(100 µg/ml Zeocin)            | GAP promoter (protein ID in JGI*: 37283) | 293 bp (-302 to -10 bp upstream of start codon)    | 186 bp (-488 to -303 bp upstream of start codon)   |
| <i>P. kudriavzevii</i><br>(SES-A, -A-NC, -A(0-8BS), -A-NC(0-8BS), -B, -B-NC)                        | HPH<br>(500 µg/ml Hygromycin B)             | PDC1 (gene ID in EFD**: JL09_g917)       | 624 bp (-998 to -374 bp upstream of start codon)   | 720 bp (-528 to +192 bp downstream of stop codon)  |
| <i>Y. lipolytica</i><br>(SES-A, -A-NC, -B, -B-NC; YI_TEF1p)                                         | NAT<br>(400 µg/ml Nourseothricin)           | ANT1 (protein ID in JGI*: 68263)         | 755 bp (-1000 to -246 bp upstream of start codon)  | 294 bp (+7 to +300 bp downstream of stop codon)    |
| <i>A. niger</i><br>(SES-A, -A-NC, -A(0-8BS), -B, -B-NC, An_gpdAp)                                   | pyrG<br>(absence of uracil)                 | gaaC (protein ID in JGI*: 1158310)       | 1955 bp (-1974 to -20 bp upstream of start codon)  | 1692 bp (+165 to 1846 bp downstream of stop codon) |
| <i>T. reesei</i><br>(SES-A, -A-NC, -B, -B-NC)                                                       | HPH<br>(150 µg/ml Hygromycin B)             | PEP4 (protein ID in JGI*: 77579)         | 958 bp (-1029 to -69 bp upstream of start codon)   | 992 bp (+3 to 995 bp downstream of stop codon)     |
| <i>T. reesei</i><br>(SES_C)                                                                         | HPH<br>(150 µg/ml Hygromycin B)             | CBHI (protein ID in JGI*: 123989)        | 2186 bp (-2184 to +2 bp upstream of start codon)   | 1746 bp (+692 to 2438 bp downstream of stop codon) |

|                                  |                                      |                                             |                                                    |                                                                |
|----------------------------------|--------------------------------------|---------------------------------------------|----------------------------------------------------|----------------------------------------------------------------|
| <i>C. apicola</i><br>(SES-B+NAT) | NAT<br>(200 µg/ml<br>Nourseothricin) | <i>S. cerevisiae</i><br>URA3 homolog<br>*** | 799 bp (-872 to -73 bp<br>upstream of start codon) | 807bp (+4 to 811 bp<br>downstream of stop<br>codon)            |
| <i>Z. lentus</i><br>(SES-B+NAT)  | NAT<br>(200 µg/ml<br>Nourseothricin) | <i>S. cerevisiae</i><br>YIP3 homolog<br>*** | 549 bp (-642 to -93 bp<br>upstream of start codon) | 499 bp (+370 bp of ORF<br>to +291 downstream of<br>stop codon) |

\*JGI = Joint Genome Institute's database (<http://genome.jgi.doe.gov/programs/fungi/index.jsf>)

\*\* EFD = Ensembl Fungi database (<http://fungi.ensembl.org/index.html>)

\*\*\* - no public genome database available

### Supplementary Table 6

GaaC targeting sequences used for crRNA design for *A. niger* transformation, and URA3 targeting sequences used for crRNA design for *C. apicola* transformation.

| Target  | Sequence             |
|---------|----------------------|
| gaaC_1  | TGAAGGGTCGAAGAAAGTCA |
| gaaC_2  | GCCAGCGAACAATCCATTCG |
| gaaC_3  | GAATTGCACTCTTCGTACCG |
| Ca_URA3 | GGATATCGGCAGTACTGTGA |

## Supplementary Table 7

Primers used for RT-PCR-based analysis of single copy SES system (or promoter-control system) genome-integration. The RT-PCR signals of mCherry and /or the sTF coding sequences were compared to the signals of reference genes in each transformed SES-strain. In cases of the control promoter strains, only the mCherry coding sequence was used.

| Primer number | Target                                               | ID in database                    | Primer name         | Sequence                 |
|---------------|------------------------------------------------------|-----------------------------------|---------------------|--------------------------|
| 890           | mCherry                                              |                                   | mCherry_qPCR_F      | GTGATGAACTTCGAGGACGG     |
| 891           |                                                      |                                   | mCherry_qPCR_R      | TTCAGCCTCTGCTTGATCTC     |
| 1366          | Bm3R1 (A.n.)                                         |                                   | An_Bm3R1_qPRC_F     | GTCACATTCACAAAGAACCATCC  |
| 1367          |                                                      |                                   | An_Bm3R1_qPRC_R     | GACCTCCATAAACGATCCGA     |
| 1308          | Bm3R1 (S.c.)                                         |                                   | Bm3R1_qPCR_F        | TCACCAAGAACCATCCTAGAG    |
| 1309          |                                                      |                                   | Bm3R1_qPCR_R        | GAAAGAACCGAACAAGATAGCA   |
| 1439          | <i>Y. lipolytica</i> actin<br>(reference gene)       | protein ID<br>in JGI*:<br>70741   | Yl_ACT_qPCR_F       | ACTCAATGCCGACACAAAGAC    |
| 1440          |                                                      |                                   | Yl_ACT_qPCR_R       | TCAGATCCTACATCCAGTACCAG  |
| 484           | <i>S. cerevisiae</i> IPP1<br>(reference gene)        | protein ID<br>in JGI*:<br>254     | Sc_IPP1_qPCR_F      | ACTTTGAACCCAATCATCCA     |
| 485           |                                                      |                                   | Sc_IPP1_qPCR_R      | CACCAACTGCCTTAGTTTCTG    |
| 1441          | <i>P. kudriavzevii</i> actin<br>(reference gene)     | gene ID in<br>EFD**:<br>JL09_g438 | Pk_ACT_qPCR_F       | TAACGAAAGATTTCAGAGACCAG  |
| 1442          |                                                      |                                   | Pk_ACT_qPCR_R       | AGCCAATGCAGTGATTTCTT     |
| 1732          | <i>P.pastoris</i> IPP1<br>(reference gene)           | protein ID<br>in JGI*:<br>35302   | Pp_IPP_qPCR_F       | GTAAGTGTTCCTCACCAC       |
| 1733          |                                                      |                                   | Pp_IPP_qPCR_R       | CAACAAAGCCATAACACCGA     |
| 1784          | <i>T.reesei</i> actin<br>(reference gene)            | protein ID<br>in JGI*:<br>44504   | Tr_act_qPCR_gDNA_F  | GCCTTCTATGTCTCCATCCAG    |
| 1785          |                                                      |                                   | Tr_act_qPCR_gDNA_R  | CTCAGCCAGGATCTTCATCAG    |
| 480           | <i>A. niger</i> sdhA<br>(reference gene)             | protein ID<br>in JGI*:<br>53356   | An_sdhA_qPCR_gDNA_F | GGTTGTTGACATTAACTCCGA    |
| 481           |                                                      |                                   | An_sdhA_qPCR_gDNA_R | CCACAGTTCATACAAGGCTC     |
| X-67          | <i>C. apicola</i> <i>ubc7</i><br>homolog (ref. gene) | ***                               | Ca_UBC7_qPCR_F      | GGTGATGACCCAAACATGTATGAG |
| X-68          |                                                      |                                   | Ca_UBC7_qPCR_R      | AGTGCCATAATATCTGAGCGA    |
| X-90          | <i>Z. lentus</i> <i>act1</i><br>homolog (ref. gene)  | ***                               | Zl_ACT1_qPCR_F      | GTTACTCGTTCTCGACCACC     |
| X-91          |                                                      |                                   | Zl_ACT1_qPCR_R      | GCTCTGAACCTCTCGTTACC     |

\*JGI = Joint Genome Institute's database (<http://genome.jgi.doe.gov/programs/fungi/index.jsf>)

\*\* EFD = Gene ID in Ensembl Fungi database (<http://fungi.ensembl.org/index.html>)

\*\*\* - no public genome database available



### Supplementary Table 8

The detector's voltages which were used for quantification of forward scatter (FSC) and mCherry in flow cytometry analysis.

| <b>Organism</b>                                      | <b>FSC voltage (V)</b> | <b>mCherry voltage (V)</b> |
|------------------------------------------------------|------------------------|----------------------------|
| <i>S. cerevisiae/ Y. lipolytica/ P. kudriavzevii</i> | 43                     | 527                        |
| <i>P. pastoris</i>                                   | 5                      | 450                        |
| <i>T. reesei</i>                                     | 110                    | 429                        |
| <i>A. niger</i>                                      | 43                     | 429                        |

## Supplementary Table 9

Primers and gene targets used in transcription analysis.

| Universal primers              |                          |                                  |                 |                          |
|--------------------------------|--------------------------|----------------------------------|-----------------|--------------------------|
| Primer number                  | Target (amplicon length) | ID in database                   | Primer name     | Sequence                 |
| 890                            | mCherry (211 bp)         |                                  | mCherry_qPCR_F  | GTGATGAACTTCGAGGACGG     |
| 891                            |                          |                                  | mCherry_qPCR_R  | TTCAGCCTCTGCTTGATCTC     |
| 1366                           | Bm3R1 (A.n.) (209 bp)    |                                  | An_Bm3R1_qPCR_F | GTCACATTCACAAAGAACCATCC  |
| 1367                           |                          |                                  | An_Bm3R1_qPCR_R | GACCTCCATAAACGATCCGA     |
| 1308                           | Bm3R1 (S.c.) (193 bp)    |                                  | Bm3R1_qPCR_F    | TCACCAAGAACCATCCTAGAG    |
| 1309                           |                          |                                  | Bm3R1_qPCR_R    | GAAAGAACCGAACAAGATAGCA   |
| <i>Y. lipolytica</i> primers   |                          |                                  |                 |                          |
| Primer number                  | Target                   | ID in database                   | Primer name     | Sequence                 |
| 1483                           | <i>UBC6</i> (204 bp)     | Protein ID in JGI*: 69371        | Yl_UBC_qPCR_F   | GCAGGAAGTATGACATCCAC     |
| 1484                           |                          |                                  | Yl_UBC_qPCR_R   | TGATGACTGTGCTCTTAGCC     |
| 1445                           | <i>TEF1</i> (204 bp)     | Protein ID in JGI*: 66455        | Yl_TEF_qPCR_F   | CGACTCTTCAACGCTCAGG      |
| 1446                           |                          |                                  | Yl_TEF_qPCR_R   | GACCATCTTGACAATGGCGG     |
| <i>S. cerevisiae</i> primers   |                          |                                  |                 |                          |
| Primer number                  | Target                   | ID in database                   | Primer name     | Sequence                 |
| 1189                           | <i>UBC6</i> (201 bp)     | Protein ID in JGI*: 2053         | Sc_UBC6_qPCR_F  | ACTTCCCGTCTGATTATCCA     |
| 1190                           |                          |                                  | Sc_UBC6_qPCR_R  | TAATTGATCCTGTCGTGGCT     |
| 1419                           | <i>TEF1</i> (189 bp)     | Protein ID in JGI*: 6442         | Sc_TEF1_qPCR_F  | AACATGATTGAAGCTACCACC    |
| 1420                           |                          |                                  | Sc_TEF1_qPCR_R  | GCACAGTACCAATACCACCA     |
| <i>P. kudriavzevii</i> primers |                          |                                  |                 |                          |
| Primer number                  | Target                   | ID in database                   | Primer name     | Sequence                 |
| 1489                           | <i>UBC6</i> (207 bp)     | Transcript ID in EFD**: KGK40836 | Pk_UBC_qPCR_F   | CCTTCATGACTGGAGATGAGAG   |
| 1490                           |                          |                                  | Pk_UBC_qPCR_R   | GTGGATTCGGATTGCTTCTG     |
| 1443                           | <i>TEF1</i> (214 bp)     | Transcript ID in EFD**: KGK37491 | Pk_TEF_qPCR_F   | CTTGGATTGTCACTGCCC       |
| 1444                           |                          |                                  | Pk_TEF_qPCR_R   | TTTGTCTCATATCTCTGACTGCGA |
| <i>P. pastoris</i> primers     |                          |                                  |                 |                          |
| Primer number                  | Target                   | ID in database                   | Primer name     | Sequence                 |
| 1730                           | <i>UBC6</i> (208 bp)     | Protein ID in JGI*: 36033        | Pp_UBC_qPCR_F   | ACCACCGGATCTATAAGCAC     |
| 1731                           |                          |                                  | Pp_UBC_qPCR_R   | ATAGCACCTTCAGCAGTATCAG   |
| 1728                           | <i>TEF1</i> (201 bp)     | Protein ID in JGI*: 36802        | Pp_TEF_qPCR_F   | CGAGTTGATTGAGAAGATTGACAG |
| 1729                           |                          |                                  | Pp_TEF_qPCR_R   | GGACTTGATAACACCGACAG     |

| <b><i>T. reesei</i> primers</b> |                          |                                |                |                         |
|---------------------------------|--------------------------|--------------------------------|----------------|-------------------------|
| Primer number                   | Target                   | ID in database                 | Primer name    | Sequence                |
| 1487                            | <i>UBC6</i><br>(207 bp)  | Protein ID in JGI*:<br>77732   | Tr_UBC_qPCR_F  | CCAACATCCTCGAATGGCAC    |
| 1488                            |                          |                                | Tr_UBC_qPCR_R  | GCTGGGTTGAAGGATTCGG     |
| 1417                            | <i>tef1a</i><br>(193 bp) | Protein ID in JGI*:<br>46958   | Tr_TEF_qPCR_F  | AAGTCTACCACCACTGGTCAC   |
| 1418                            |                          |                                | Tr_TEF_qPCR_R  | TTGGGAGTCTCGAACTCCAG    |
| 1481                            | Actin<br>(195 bp)        | Protein ID in JGI*:<br>44504   | Tr_act_qPCR_F  | CAACATTGTCATGTCTGGTGG   |
| 1482                            |                          |                                | Tr_act_qPCR_R  | CTGCTTGAGATCCACATCTG    |
| 1479                            | <i>cbh1</i><br>(201 bp)  | Protein ID in JGI*:<br>123989  | Tr_CBH1_qPCR_F | AGAATGGCGTCACTTCCAG     |
| 1480                            |                          |                                | Tr_CBH1_qPCR_R | TTGGCGTAGTAATCATCCAC    |
| <b><i>A. niger</i> primers</b>  |                          |                                |                |                         |
| Primer number                   | Target                   | ID in database                 | Primer name    | Sequence                |
| 1485                            | <i>UBC6</i><br>(204 bp)  | Protein ID in JGI*:<br>1180989 | An_UBC_qPCR_F  | ATACTCGAATGGCACTACATCCT |
| 1486                            |                          |                                | An_UBC_qPCR_R  | ATGCGGGATTAATGACTTCGG   |
| 1415                            | <i>tefA</i><br>(181 bp)  | Protein ID in JGI*:<br>1147607 | An_TEF_qPCR_F  | CGTCATCATGGGTAAGGAGG    |
| 1416                            |                          |                                | An_TEF_qPCR_R  | AAGCGTACTGAAGGAACCC     |

\*JGI = Joint Genome Institute's database (<http://genome.jgi.doe.gov/programs/fungi/index.jsf>)

\*\* EFD = Gene ID in Ensembl Fungi database (<http://fungi.ensembl.org/index.html>)

### Supplementary Table 10

*Z. lentus* ACT1 – partial CDS

```
CCCGAGGAGCACCCAGTTCTGTTGACCGAGGCGCCATGAACCCCAAGTCAACAGAGAGAAGATGACGCAGATCATGTTTCGAGACTTTCAA  
CGTGCCTGCGTTCTACGTCTCGATCCAGGCCGTCTTGTGCTATACTCGTCCGGTAGAACGACCGGTATCGTGTGGACTCCGGTGACGGTGT  
GACCCACGTCGTGCCATCTACGCCGTTTCTCGATGCCTCAGCCATTTTGAAGATCGACTTGGCCGGTAGAGACTTGACCGACTACTTGATG  
AAGATTTTGAAGGAAAGGGGTTACTCGTTCTCGACCACCGCCGAGAGGGAAATCGTGCCTGACATCAAGGAGAAGCTGTGCTACGTCGCGCT  
CGACTTCGAGCAGGAGATGCAGACCGCGGCCAGTCTCGTCCGTGGAGAAGTCTGACGAGTTGCCCGACGGTCAGGTGATCACCATCGGTA  
ACGAGAGGTTGAGAGCCCTGAGGCGCTGTCCACCCATCCGTTTTGTCGTTGGAGTCTCCGGTGTGACCAGACCACTTACAATCCATCAT  
GAAGTGCAGCTGCAGCTCCGTAAGGACTTGTACGGTAACATCGTATGTCCGGTGGTACCACGATGTTCCCGGTATCGCCGAGAGAATGC  
AGAAGGAGATCACCAGGTTGGCTCCATCCTCCATGAAGGTCAAATCATCGTCCACCAGAGAGAAAATACTCCGTTGGATCGGTGGCTCCA  
CTTGGCCTCTTGACCACTTTCAACAGATGTGGATCTCGAAACAAGAGTACGA
```

### Supplementary Table 11

*Z. lentus* YIP3 – genomic fragment (CDS highlighted)

```
TCTGGAGCGGCGCATCACGGGTGCGGTGCATGGGAACAGCACGTACCTGAGCGCCTGATCGGGTGAACGATCTCTCGAATCGATTG  
CCGCCATGACCGACCCGGACAGGTTTTGCAAGTCTGCTGCAGGACTTGGGTCAAGCCGGTATCCAGATGAGGCGTCTCGTCCGTGCCATAC  
GAGAAGGGATTCAACCTTTTGTCCACCTGGAACAGGTGGTAGGCGGCAAGCAGCAGTTCCGACCCGTTTGTGAGACTATTTTACCAAGTTT  
GCCAGGCAGTCGCTGGACACGTTCCAGTTCCTGGACACTTTGTTGAGTTTTACCGGGACAAGAGAGGGGCACTCGATGGCGTGGACTGGGA  
GACGTGGCTGTACAGGCCGGGATTGCCTCAAAGCCGAGTTCGACACTTCTTGGCAGACGACGTGTACGCGGTGGCAGAGCGGTGGTTCC  
ATGCGGCGCACGAGGGGCACTACGATGGGTTCTATCCGAGGATCTTGCACAGTGCAGCACTACGCAACTGGTGTGTTCTTGGACACTTTG  
GTGCAGGCCAAGCGGCTGGACTGGACCAAGCATAAGGATGCCGTAAGCAGGCTGCTGGATGTCTATCACGAAAGGGTAGTCGCTCCGAGA  
ATGCAGAAATTTGTTTTAGGAAATTTAGGCTACAGTTGAGGCAAGAATGCAGGAGGCTTACGGGCGCTGGCACAGTGGTTGGGCACTGTG  
GGGCGCATGAAGTTGTTGAGGCCAGGTTACCGGCTCTAAACAGAGTGGACAGACCGCTGGCGTTGGAAACGTTTGCACAAATCAAAGACAC  
CTATACCCCATCTGCAAGGCACTCGTGAAGCAGGATTTGAAATTGTAGCGGTTCTTGTGACCATGTGTACGTACAAAATGCGCTGCTCCGCT  
ATTTGCGTTAGCCTTGCAGCTGTTGACAACAAACACTTCTCATCACACAGTTGAATCAGAAGACCAACCAGCAAAACCAACCATGAACCA  
GATAGGCGCTCAAGTGTATGTGCACTGACGGATGCCACACCCCTACCGCCTCTTTGATCCACCGTACTAACTTTTCTCCAGCAATTCTC  
CAATCTACCGAGAACCTCTGTGGAACGCTCAAGAGCGAGATCAAACAGTGCAGAGCAAACCTCCTCCGTGCGCCACCGCAGGAGTTT  
CTTCAACGTCAGAAGCTTTTCAAACCGCAAATTTGCGAGAGTTGAATCTAGGGTCTCTACAACATCAAGTACTACCAGTCCAACATATGCC  
TCATCGTCGGAGCCCTCAGCGTGTACAGCCTTTGACCAACCTCCTGCTCCTGTTGATAGCACTCGTCTGCTGGTGTGCGAGGCATCAG  
CAGGCTTAGGGGCGAAGACTGGGTGACACCTTTGCGCACGCTGAAGGCCACACAGCTGTACACGGTGTGCTTTGTGTTACGCTGCCCTTGG  
CTTTTTGGCATCTCCCTTACCACCATCTGTGGCTCGTGGGCGCTCCTCCGTACCGTCTATGGGTGACGCTCCTTATGGAGAAACCATCC  
AGGTCGTTTCGAGGAGGAAACTGTGTAGTTTACAGCATATATCAGCGTATGGACCTTTAATAGATTCTCAAACAGGGTTTCCGTACCGGCC  
CCGCCCTGATTTGATTTCAAGTGTTCGAAGCAAATACCGGGGACTCCACCGCTTCCATCACAGTATTCAATAGAATAGAAATGATGTTTC  
TTTTGGTATAGCTGTAGGATTTGCGACGTACTTATTTTTCGAAGTACATACCATCGTTGAACCGGACGTGGTACTACTGCTGCTGCGCC  
GGCTCTCCGATGGAGAAAGACTTTAAACAAGCCGATGTCCTTTTCAAGTATAGTATAGTACCCACCCCGATCCCCCCCCCACAATGAC  
TATCTATCCAATGGAGCTAATCGCTTACATCGTATTCTTCCGATCTGCGGG
```

### Supplementary Table 12

DNA sequences of the established fugal promoters commonly used for gene expression control. These sequences were used for comparisons with the SES-A system in selected yeast and filamentous fungi species.

| Promoter                                 | Sequence                                                                                                                                                                                                                                                                                                                                                                                                                                                                                                                                                                                                                                    |
|------------------------------------------|---------------------------------------------------------------------------------------------------------------------------------------------------------------------------------------------------------------------------------------------------------------------------------------------------------------------------------------------------------------------------------------------------------------------------------------------------------------------------------------------------------------------------------------------------------------------------------------------------------------------------------------------|
| <i>S. cerevisiae</i><br>PGK1<br>promoter | GACTTCACTCAAGACGCACAGATATTATAACATCTGCATAATAGGCATTTGCAAGAATTACTCGTGAAGTAAAGAA<br>AGAGTGAGGAAGTATCGCATACTGCATTTAAAGATGCCGATTTGGGCGCGAATCCTTTATTTTGGCTTACCCTCA<br>TACTATTATCAGGGCCAGAAAAAGGAAAGTGTTCCTCCTTCTTGAATTGATGTTACCCTCATAAAGCACGTGGCCT<br>CTTATCGAGAAAGAAATTACCGTCTGCTGATTTGTTTGAAGAAAGAAACTGAAAAACCCAGACACGCTC<br>GACTTCTGTCTTCTATTGATTGACGCTTCAATTTGCTCACACAACAAGGCTCCTAGCGACGGCTCACAGTTTTGT<br>ACAAGCAATCGAAGGTTCTGGAATGGCGGAAAGGTTTAGTACCACATGCTATGATGCCACTGTGATCTCCAG<br>AGCAAAGTTCGTTGATCGTACTGTTACTCTCTCTTTCAAACAGAAATGTCGAATCGTGTGACAACAACAGCCTG<br>TTCTCACACACTTTTTCTTAAACCAAGGGGGTGGTTAGTTAGTAGAACCTCGTGAACCTTACATTTACATATAT |

|                                                 |                                                                                                                                                                                                                                                                                                                                                                                                                                                                                                                                                                                                                                                                                                                                                                                                                                                                                                                                                                                                                                                                                                                                                                                                                                                                                                                                                                                                                                                                                                                                                                                                                                                                                                                                                                                                                                                                                                                                                                                                                                                                                                                                                                                                                                                                                                                                                                                                                                            |
|-------------------------------------------------|--------------------------------------------------------------------------------------------------------------------------------------------------------------------------------------------------------------------------------------------------------------------------------------------------------------------------------------------------------------------------------------------------------------------------------------------------------------------------------------------------------------------------------------------------------------------------------------------------------------------------------------------------------------------------------------------------------------------------------------------------------------------------------------------------------------------------------------------------------------------------------------------------------------------------------------------------------------------------------------------------------------------------------------------------------------------------------------------------------------------------------------------------------------------------------------------------------------------------------------------------------------------------------------------------------------------------------------------------------------------------------------------------------------------------------------------------------------------------------------------------------------------------------------------------------------------------------------------------------------------------------------------------------------------------------------------------------------------------------------------------------------------------------------------------------------------------------------------------------------------------------------------------------------------------------------------------------------------------------------------------------------------------------------------------------------------------------------------------------------------------------------------------------------------------------------------------------------------------------------------------------------------------------------------------------------------------------------------------------------------------------------------------------------------------------------------|
|                                                 | ATAAACTTGATAAATTGGTCAATGCAAGAAATACATATTTGGTCTTTTCTAATTCGTAGTTTTTCAAGTCTTAGAT<br>GCTTTCTTTTTCTTTTTTACAGATCATCAAGGAAGTAATTATCTACTTTTTACAACAAATTA                                                                                                                                                                                                                                                                                                                                                                                                                                                                                                                                                                                                                                                                                                                                                                                                                                                                                                                                                                                                                                                                                                                                                                                                                                                                                                                                                                                                                                                                                                                                                                                                                                                                                                                                                                                                                                                                                                                                                                                                                                                                                                                                                                                                                                                                                             |
| <i>Y. lipolytica</i><br><i>TEF1</i><br>promoter | GAAAAGTCTCTACAAGTAGTCTTGAAAAACATTCCCCACAGTAACCATCTATATTGCAAAAACATACGACTGCAAT<br>TGGGGATTGTTGCTCGTATCGCACCCGTACCGTGCCACCCTAACACCCCCAGACCAATCACTACGACCGATCCA<br>ACTCCACGTTTTCTGCTACCCAGTCTGCTGGCCGGCTTGGCTTTGCGTTTCGCTCCCACTACACCGTAATACCAGT<br>CACTCTCATTGCAGTTACCCTGCCCGTAGTCGCTCGATCCACCTCCTCCTCTCTCGTGTGTGCAGCAAAGAGGCA<br>GAGATGGAGCCGTATGGTGAGCCGTAGAGTGGAGCGAGGGGGCGATCTTACAACGGCTGTCGGCGGATATAAAC<br>GGTATTTTCACAATTGCACCCAGCCAGACCGATAGCCGGTGCAGTCCGCCACCCACAACCGTCTACCTCCACAG<br>AACCCCGTCACTTCCACCCTTTTCCACCAGATCATATGTCCCAACTTGCCAAATTAACCCGTGCGAATTTTCAAAT<br>AACTTTGGCAAAGAGGCTGCAAAGGAGGGGCTGGTGAGGGCGTCTGGAAGTCGACCAGAGACCGGTTGGCGG<br>CGCATTTGTGTCCCAAAAAACAGCCCAATTGCCCAATTGACCCCAATTGACCCAGTAGCGGGCCAAACCCCGC<br>GAGAGCCCTTCTCCACATATCAAACCTCCCGGTTCCACACTGCGGTTAAGGGCGTAGGGTACTGCAGTC<br>TGGAACTACGCTTGTTCAGACTTTGTACTAGTTTCTTTGTCTGGCCATCCGGGTAACCCATGCCGACGCAAAATA<br>GACTACTGAAAATTTTTTGTCTTGTGGTTGGGACTTAGCCAAGGGTATAAAAGACCACCGTCCCGAATTACCTTT<br>CCTCTCTTTCTCTCTCTCTCTGTCAACTCACACCCGAAATCTTAAGCATTTCCTTCTGAGTATAAGAATCATTCAAA                                                                                                                                                                                                                                                                                                                                                                                                                                                                                                                                                                                                                                                                                                                                                                                                                                                                                                                                                                                                                                                                                                                                                                                                                                                                                                                                                                                     |
| <i>P. pastoris</i><br><i>GAP1</i><br>promoter   | TTTTGTAGAAATGCTTGGTGTCTCGTCCAATCAGGTAGCCATCTCTGAAATATCTGGCTCCGTTGCAACTCCGAA<br>CGACCTGCTGGCAACGTAATAATTCTCCGGGGTAAACTTAAATGTGGAGTAATGGAACAGAAACGTCTCTTCCCTT<br>CTCTCTCTTCCACCGCCGTTACCGTCCCTAGGAAATTTACTCTGCTGGAGAGCTTCTTACGGCCCTTGCAG<br>CAATGCTCTTCCAGCATTACGTTGCGGGTAAACGGAGGTCGTGTACCCGACCTAGCAGCCAGGGATGAAAA<br>GTCCCGCCGTCGTTGCAATAATAGCGGGCGGACGCATGTCATGAGATTATTGGAACCACCAGAATCGAATA<br>AAAGGCGAACACCTTTCCCAATTTTGGTTTTCTCTGACCCAAAGACTTTAAATTTAATTTATTTGTCCCTATTTCAATC<br>AATTGAACAATAT                                                                                                                                                                                                                                                                                                                                                                                                                                                                                                                                                                                                                                                                                                                                                                                                                                                                                                                                                                                                                                                                                                                                                                                                                                                                                                                                                                                                                                                                                                                                                                                                                                                                                                                                                                                                                                                                                                                                           |
| <i>A. nidulans</i><br><i>gpdA</i><br>promoter   | CCTTGTATCTCTACACACAGGCTCAAATCAATAAGAAGAACGGTTCGCTTTTTCGTTTATATCTTGCATCGTCCAA<br>AGCTATTGGCGGGATATTCTGTTGCAAGTGGCTGACTTGAAGTAATCTCTGCAGATCTTTCGACACTGAAATACGT<br>CGAGCTGCTCCGCTTGAAGCGGCGAGGAGCCTCGTCTGTCACAACTACCAACATGGAGTACGATAAGGGCCA<br>GTTCCGCCAGCTCATTAAAGAGCCAGTTCATGGGCGTTGGCATGATGGCCGTATGCATCTGTACTTCAAGTACACCA<br>ACGCTCTTCTGATCCAGTGCATATCCGCTGAAAGCGCTTTCGAATCTGGTTAAGATCCACGCTTTCGGGAAGCCAG<br>CGACTGGTGACCTCCAGCGTCCCTTTAAGGCTGCCAACAGCTTCTCAGCCAGGGCCAGCCAAAGACCCGACAAGGC<br>CTCCCTCCAGAACGCCGAGAAGAACTGGAGGGGTGGTGTCAAGGAGGAGTAAGCTCCTTATTGAAGTCGGAGGAC<br>GGAGCGGTGTCAAGAGGATATTCTCGACTCTGTATTATAGATAAGATGATGAGGAATTGGAGGTAGCATAGCTTC<br>ATTTGGATTTGCTTCCAGGCTGAGACTTAGCTTGGAGCATAGAGGGTCTTTGGCTTCAATATTCTCAAGTATCT<br>CGATTTGAACCTATTCCCTGTGAACCTTTTATTCACCAATGAGCATTGGAATGAACATGAATGAACTGCAAT<br>CGCATGAGGTTTTCGAAATACATCCGATGTCGAAGCTTGGGGCACCTGCGTTGGTTGAATTTAGAACGTGGCA<br>CTATTGATCATCCGATAGCTCTGCAAAGGGCGTTGCACAATGCAAGTCAAACGTTGCTAGCAGTTCAGGTGGAAT<br>GTTATGATGAGCATTGTATTAATCAGGAGATATAGCATGATCTCTAGTTAGCTCACCACAAAAGTCAGACGGCGT<br>AACCAAAAGTCACACAACACAAGCTGTAAGGATTTCCGACCGGCTACGGAAGACGGAGAAGCCACCTTCAGTGGA<br>CTCGAGTACATTAATTCTATTTGTGTTGATCGAGACCTAATACAGCCCTACAACGACCATCAAAGTCGTATAGC<br>TACCAGTGAGGAAGTGGACTCAAATCGACTTCAGCAACATCTCTGGATAAACTTTAAGCTAAACTATACAGAATA<br>AGATAGGTGGAGACTTATACCGAGCTCCCAAATCTGTCCAGATCATGGTTGACCGGTGCCTGGATCTTCTATAG<br>AATCATCTTATTCTGTTGACCTAGCTGATTCTGGAGTGACCCAGAGGGTCATGACTTGAGCCTAAAATCCGCCGCT<br>CCACATTTGTAGAAAAATGTGACGAACTCGTGAGCTGTACAGTGACCGGTGACTCTTTCTGGCATGCGGAGAG<br>ACGGACGGACGCAGAGAGAAGGGCTGAGTAATAAGCCACTGCCAGACAGCTTGGCGGCTCTGAGGTGCAGTG<br>GATGATTATTAATCCGGGACCGCCCGCCCTCCGCCCGAAGTGGAAGGCTGGTGTGCCCTCGTTGACCAAGAA<br>TCTATTGCATCATCGGAGAATATGGAGCTTATCGAATACCCGGCAGTAAGCGAAGGAGAATGTGAAGCCAGGGG<br>TGTATAGCCGTCGGCGAAATAGCATGCCATTAACCTAGGTACAGAAGTCCAATTGCTTCCGATCTGGTAAAAGATT<br>ACGAGATAGTACCTTCTCCGAAGTAGGTAGAGCGAGTACCCGGCGCGTAAGCTCCCTAATTGGCCATCCGGCATC<br>TGTAGGGCGTCCAAATATCGTGCTCTCTGCTTTGCCGGTGTATGAAACCGGAAAGGGCGCTCAGGAGCTGGCC<br>AGCGGCGCAGACCGGAAACACAAGCTGGCAGTCGACCCATCCGGTCTGCTGACTCGACTGCTGAGGTCCCTCA<br>GTCCCTGGTAGGCAGCTTTGCCCGTCTGTCCGCCGGTGTGTCGGCGGGGTTGACAAGGTGTTGCGTCAGTCCA<br>ACATTTGTTGCCATATTTTCTGCTCTCCCAACAGCTGCTTTTTCTTTCTTTTCTTTTCCATCTTCAGTATATCA<br>TCTTCCATCCAAGAACCTTTATTTCCCTAAGTAAGTACTTTGCTACATCCATACTCCATCTTCCATCCCTTATCC<br>TTTGAACCTTTCAGTTCGAGCTTTCCACTTTCATCGCAGCTTGACTAACAGCTACCCCGCTTGAGCAGACATCA |
